# Supplementary material
Source: ML conference proceedings conference paper supplement (https://proceedings.neurips.cc/paper_files/paper/2022/hash/05b69cc4c8ff6e24c5de1ecd27223d37-Abstract.html)
Supplement: Supplementary file 1 [file 05b69cc4c8ff6e24c5de1ecd27223d37-Supplemental-Conference.pdf]

---

# Supplementary Material

## Density-driven Regularization for Out-of-distribution Detection

---

### A.1 Proof of lemma 1

**Lemma 1.** *If Eq.(3) holds, then*

$$\frac{\sum_{1 \leq i \leq N} \exp(h^y(X_i))}{\sum_{1 \leq i \leq N} \sum_{1 \leq l \leq L} \exp(h^l(X_i))} - \frac{n_y}{N} \xrightarrow{a.s.} 0; \forall 1 \leq y \leq L$$

*Proof.* First, according to Eq.(7), the left-hand side of the following equation converges to  $Z$  almost surely (a.s.) and in probability as  $N \rightarrow \infty$ .

$$\frac{N \sum_{1 \leq i \leq N} \exp(h^y(X_i))}{n_y N} \approx \frac{\sum_{1 \leq i \leq N} \sum_{1 \leq l \leq L} \exp(h^l(X_i))}{N}; \forall 1 \leq y \leq L$$

Next, according to the law of large number, the right-hand side also converges to  $Z$  a.s. and in probability as  $N \rightarrow \infty$  by Eq.(3). Specifically,

$$\frac{\sum_{1 \leq i \leq N} \sum_{1 \leq l \leq L} \exp(h^l(X_i))}{N} \xrightarrow{a.s.} \int \sum_{1 \leq l \leq L} \exp(h^l(X)) d\nu_X = \iint \exp(h^y(X)) d\pi_Y d\nu_X = Z$$

By simple transformation of the first equation, we obtain the lemma.  $\square$

### A.2 Proof of lemma 2

**Lemma 2.** *If Eq.(3) holds, then*

$$\Upsilon_N^y = \sqrt{N} \left( \frac{\sum_{1 \leq i \leq N} \exp(h^y(X_i))}{\sum_{1 \leq i \leq N} \sum_{1 \leq l \leq L} \exp(h^l(X_i))} - \frac{n_y}{N} \right) \rightarrow_d \mathcal{N}(0, \Delta^y)$$

where  $\Delta^y \triangleq [\nabla g(\mu^y)]^\top \Sigma^y [\nabla g(\mu^y)]$  and  $g([x, y, z]^\top) = y/x - z$ .  $\mu^y$  and  $\Sigma^y$  represent the mean and covariance matrix for random vector  $u^y = [\sum_{1 \leq l \leq L} \exp(h^l(X)), \exp(h^y(X)), 1_{\{Y=y\}}]^\top$ .

*Proof.* First consider the random vector

$$u_i^y = \begin{bmatrix} \sum_{1 \leq l \leq L} \exp(h^l(X_i)) \\ \exp(h^y(X_i)) \\ 1_{\{Y_i=y\}} \end{bmatrix} \quad \text{and} \quad U_N^y = \sum_{1 \leq i \leq N} u_i^y.$$

For independent and identically distributed (i.i.d.) random vector  $u_i^y$ , the multidimensional central limit theorem (CLT) gives

$$\sqrt{N} \left( \frac{U_N^y}{N} - \mu^y \right) = \frac{1}{\sqrt{N}} (U_N^y - N\mu^y) \rightarrow_d \mathcal{N}(0, \Sigma^y)$$

where  $\mu^y$  and  $\Sigma^y$  are the mean and covariance matrix for  $u_i^y$ , respectively. Let

$$g([x, y, z]) = y/x - z.$$

Then, by using delta-method [1], we obtain

$$\sqrt{N} \left( g \left( \frac{U_N^y}{N} \right) - g(\mu^y) \right) \rightarrow_d \mathcal{N} \left( 0, [\nabla g(\mu^y)]^\top \Sigma^y [\nabla g(\mu^y)] \right)$$

where

$$g \left( \frac{U_N^y}{N} \right) = \frac{\sum_{1 \leq i \leq N} \exp(h^y(X_i))}{\sum_{1 \leq i \leq N, 1 \leq l \leq L} \exp(h^l(X_i))} - \frac{\sum_{1 \leq i \leq N} 1_{\{Y_i=y\}}}{N}$$

and  $g(\mu^y) = 0$  based on Eq.(3). Hence, we have

$$\sqrt{N} \left( \frac{\sum_{1 \leq i \leq N} \exp(h^y(X_i))}{\sum_{1 \leq i \leq N, 1 \leq l \leq L} \exp(h^l(X_i))} - \frac{n_y}{N} \right) \rightarrow_d \mathcal{N} \left( 0, [\nabla g(\mu^y)]^\top \Sigma^y [\nabla g(\mu^y)] \right).$$

□

### A.3 Equivalent regularization with normalized logit

To increase numerical stability, we normalize the classification logit by subtracting the maximal logit before calculating the regularization term  $\tilde{\lambda}$  in Algorithm 1. Here, in the following proposition, we prove that our normalized logit will theoretically produce the same results as the original logit.

**Proposition 1.** *subtracting a fixed constant from the classification logits leads to the same consistency regularization term.*

*Proof.* For  $\forall C \in R$ , subtracting  $-C$  from the original logit  $h^y(X_i)$  yields the following shifted logits  ${}^*h^y(X_i)$ :

$${}^*h^y(X_i) = h^y(X_i) + C$$

The corresponding  ${}^*\Upsilon_N^y$  and  ${}^*\Delta_N^y$  for  ${}^*h^y$  are calculated as below. First,

$$\begin{aligned} {}^*\Upsilon_N^y &= \sqrt{N} \left( \frac{\sum_{1 \leq i \leq N} e^{*h^y(X_i)}}{\sum_{1 \leq i \leq N, 1 \leq l \leq L} e^{*h^l(X_i)}} - \frac{n_y}{N} \right) \\ &= \sqrt{N} \left( \frac{\sum_{1 \leq i \leq N} e^{h^y(X_i)+C}}{\sum_{1 \leq i \leq N, 1 \leq l \leq L} e^{h^l(X_i)+C}} - \frac{n_y}{N} \right) = \Upsilon_N^y \end{aligned}$$

and, similarly, it can be shown that  ${}^*\tilde{\Upsilon}_N^y = \tilde{\Upsilon}_N^y$ . Then, by the definition of  $u_i^y$ , we have

$${}^*u_i^y = \begin{bmatrix} \sum_{1 \leq l \leq L} e^{*h^l(X_i)} \\ e^{*h^y(X_i)} \\ 1_{\{Y_i=y\}} \end{bmatrix} = \begin{bmatrix} e^C \cdot \sum_{1 \leq l \leq L} e^{h^l(X_i)} \\ e^C \cdot e^{h^y(X_i)} \\ 1_{\{Y_i=y\}} \end{bmatrix} = \begin{bmatrix} e^C (u_i^y)_1 \\ e^C (u_i^y)_2 \\ (u_i^y)_3 \end{bmatrix}$$

where subscripts 1, 2 and 3 denote the corresponding element in  $u_i^y$ . Next, by the definition of sample mean  ${}^* \mu_N^y$  and sample variance  ${}^* \Sigma_N^y$  for  ${}^* u_i^y$ , we derive:

$$\begin{aligned}
{}^* \Delta_N^y &= [\nabla g({}^* \mu^y)]^\top {}^* \Sigma^y [\nabla g({}^* \mu^y)] \\
&= \begin{bmatrix} -\frac{(\mu_N^y)_2}{(\mu_N^y)_1} & \frac{1}{(\mu_N^y)_1} & -1 \end{bmatrix} \begin{bmatrix} ({}^* \Sigma_N^y)_{11} & ({}^* \Sigma_N^y)_{12} & ({}^* \Sigma_N^y)_{13} \\ ({}^* \Sigma_N^y)_{12} & ({}^* \Sigma_N^y)_{22} & ({}^* \Sigma_N^y)_{23} \\ ({}^* \Sigma_N^y)_{13} & ({}^* \Sigma_N^y)_{23} & ({}^* \Sigma_N^y)_{33} \end{bmatrix} \begin{bmatrix} -\frac{(\mu_N^y)_2}{(\mu_N^y)_1} \\ \frac{1}{(\mu_N^y)_1} \\ -1 \end{bmatrix} \\
&= \begin{bmatrix} -\frac{1}{e^C} \frac{(\mu_N^y)_2}{(\mu_N^y)_1} & \frac{1}{e^C} \frac{1}{(\mu_N^y)_1} & -1 \end{bmatrix} \begin{bmatrix} e^{2C} (\Sigma_N^y)_{11} & e^{2C} (\Sigma_N^y)_{12} & e^C (\Sigma_N^y)_{13} \\ e^{2C} (\Sigma_N^y)_{12} & e^{2C} (\Sigma_N^y)_{22} & e^C (\Sigma_N^y)_{23} \\ e^C (\Sigma_N^y)_{13} & e^C (\Sigma_N^y)_{23} & (\Sigma_N^y)_{33} \end{bmatrix} \begin{bmatrix} -\frac{1}{e^C} \frac{(\mu_N^y)_2}{(\mu_N^y)_1} \\ \frac{1}{e^C} \frac{1}{(\mu_N^y)_1} \\ -1 \end{bmatrix} \\
&= \begin{bmatrix} -\frac{(\mu_N^y)_2}{(\mu_N^y)_1} & \frac{1}{(\mu_N^y)_1} & -1 \end{bmatrix} \begin{bmatrix} (\Sigma_N^y)_{11} & (\Sigma_N^y)_{12} & (\Sigma_N^y)_{13} \\ (\Sigma_N^y)_{12} & (\Sigma_N^y)_{22} & (\Sigma_N^y)_{23} \\ (\Sigma_N^y)_{13} & (\Sigma_N^y)_{23} & (\Sigma_N^y)_{33} \end{bmatrix} \begin{bmatrix} -\frac{(\mu_N^y)_2}{(\mu_N^y)_1} \\ \frac{1}{(\mu_N^y)_1} \\ -1 \end{bmatrix} \\
&= [\nabla g(\mu^y)]^\top \Sigma^y [\nabla g(\mu^y)] = \Delta_N^y.
\end{aligned}$$

Finally, we obtain

$$[{}^* \tilde{\Upsilon}_N^y]^\top [{}^* \Delta_N^y]^{-1} [{}^* \tilde{\Upsilon}_N^y] = [\Upsilon_N^y]^\top [\Delta_N^y]^{-1} [\Upsilon_N^y]$$

It shows that any shifted logit theoretically derives the same density regularization term.  $\square$

#### A.4 Distribution-deviating operator

The random affine and resized crop transforms from the torchvision library [2] are used as the distribution-deviating (DD) operators, including four specific transformations:  $\mathcal{S}_1$ , random affine with only rotation (angle of  $60^\circ \sim 300^\circ$  avoiding similarity);  $\mathcal{S}_2$ , random affine with both rotation and scaling (same rotation angle with a scaling factor of 1/5~5);  $\mathcal{S}_3$ , random resized crop (area ratio of 0~0.6 and aspect ratio of 1/9~9); and  $\mathcal{S}_4$ , the composed transformation of  $\mathcal{S}_2$  and  $\mathcal{S}_3$  (allowing cropping rotated images). DD set  $\mathcal{S}$  also contains a random uniform generator  $\mathcal{S}_5$  that generates uniform noises of range 0~255 as the random input image.

#### A.5 FPR95%, AUROC and AUPR for CIFAR-100 experiment

Tables 1~3, 4~6 and 7~9 below show the model comparisons in terms of AUROC and AUPR for the CIFAR-100 experiments, respectively.

Table 1: Performance comparison (mean±std, in terms of FPR95%) of various methods in CIFAR-100 (ID dataset) under ResNet34. The best and second-best models without accessing external outlier datasets are coloured red and blue, respectively.

| OOD dataset          | w/o outlier exposure (FPR95% ↓)                               |       |       |       |       |       |       |       |       |       | w/ outlier exposure (FPR95% ↓) |       |       |
|----------------------|---------------------------------------------------------------|-------|-------|-------|-------|-------|-------|-------|-------|-------|--------------------------------|-------|-------|
|                      | Msp/Odin/Mah/Energy/Gram/<br>Energy+ReAct/pNML/Odin+pNML/Ours |       |       |       |       |       |       |       |       |       | Oecc/Energy/<br>Oecc+pNML      |       |       |
| CIFAR-100 (ResNet34) | iSUN                                                          | 83.10 | 55.65 | 67.20 | 80.91 | 5.01  | 80.00 | 73.70 | 55.10 | 4.93  | 2.70                           | 54.76 | 2.14  |
|                      |                                                               | ±0.52 | ±1.09 | ±0.66 | ±0.85 | ±0.38 | ±0.81 | ±0.74 | ±0.79 | ±0.41 | ±0.23                          | ±0.60 | ±0.27 |
|                      | LSUN(R)                                                       | 80.75 | 53.15 | 68.15 | 77.44 | 2.92  | 77.75 | 70.75 | 54.90 | 3.19  | 1.72                           | 54.07 | 1.01  |
|                      |                                                               | ±0.73 | ±0.65 | ±1.15 | ±0.72 | ±0.32 | ±0.78 | ±0.56 | ±0.70 | ±0.29 | ±0.24                          | ±0.78 | ±0.21 |
|                      | LSUN(C)                                                       | 81.30 | 55.35 | 47.21 | 82.93 | 33.76 | 80.25 | 70.60 | 47.75 | 7.99  | 19.46                          | 37.20 | 10.36 |
|                      |                                                               | ±0.67 | ±0.65 | ±0.67 | ±0.75 | ±0.84 | ±0.82 | ±0.71 | ±0.75 | ±0.44 | ±0.75                          | ±0.98 | ±0.63 |
|                      | CIFAR-10                                                      | 80.95 | 85.65 | 81.57 | 81.50 | 88.12 | 83.05 | 80.00 | 81.15 | 85.08 | 85.06                          | 83.31 | 79.05 |
|                      |                                                               | ±0.98 | ±0.65 | ±0.58 | ±0.68 | ±0.35 | ±0.73 | ±0.57 | ±0.73 | ±0.41 | ±0.60                          | ±0.75 | ±0.74 |
|                      | ImageNet(R)                                                   | 79.00 | 52.55 | 63.96 | 75.70 | 5.17  | 75.95 | 67.95 | 53.75 | 4.47  | 4.60                           | 62.30 | 4.12  |
|                      |                                                               | ±0.87 | ±1.00 | ±1.05 | ±0.75 | ±0.44 | ±0.68 | ±0.77 | ±0.74 | ±0.37 | ±0.36                          | ±1.00 | ±0.35 |
|                      | ImageNet(C)                                                   | 77.40 | 57.90 | 58.55 | 73.43 | 11.68 | 72.85 | 67.00 | 53.15 | 4.07  | 9.32                           | 59.27 | 8.53  |
|                      |                                                               | ±0.91 | ±0.76 | ±0.63 | ±0.66 | ±0.50 | ±0.73 | ±0.37 | ±0.48 | ±0.36 | ±0.65                          | ±1.00 | ±0.52 |
|                      | Gaussian                                                      | 100.0 | 95.35 | 27.90 | 100.0 | 0.00  | 100.0 | 85.25 | 32.50 | 0.00  | 0.00                           | 0.01  | 0.00  |
|                      |                                                               | ±0.00 | ±0.33 | ±0.86 | ±0.00 | ±0.00 | ±0.00 | ±0.67 | ±1.02 | ±0.00 | ±0.00                          | ±0.02 | ±0.00 |
|                      | Places365                                                     | 84.55 | 84.10 | 59.75 | 85.68 | 46.89 | 85.00 | 71.25 | 61.80 | 21.12 | 31.76                          | 41.05 | 19.74 |
|                      |                                                               | ±0.66 | ±0.66 | ±0.95 | ±0.79 | ±0.91 | ±0.72 | ±0.69 | ±0.60 | ±0.98 | ±0.87                          | ±0.57 | ±0.91 |
|                      | Textures                                                      | 80.80 | 80.15 | 56.85 | 79.96 | 33.43 | 78.50 | 61.35 | 53.80 | 18.50 | 24.66                          | 43.64 | 16.38 |
|                      |                                                               | ±0.77 | ±0.64 | ±0.64 | ±0.57 | ±0.70 | ±0.66 | ±0.68 | ±0.81 | ±0.57 | ±0.51                          | ±0.60 | ±0.57 |
|                      | iNaturalist                                                   | 73.00 | 71.50 | 58.36 | 73.34 | 44.68 | 71.75 | 57.85 | 57.85 | 31.66 | 46.22                          | 68.57 | 47.49 |
|                      |                                                               | ±0.76 | ±0.73 | ±0.84 | ±1.05 | ±0.61 | ±0.95 | ±0.66 | ±1.29 | ±0.92 | ±0.62                          | ±0.81 | ±1.04 |
| SVHN                 | 79.70                                                         | 38.60 | 31.42 | 82.13 | 19.99 | 78.75 | 48.40 | 26.30 | 1.61  | 13.09 | 40.57                          | 10.23 |       |
|                      | ±0.58                                                         | ±1.00 | ±1.14 | ±0.99 | ±0.87 | ±0.95 | ±1.25 | ±1.45 | ±0.29 | ±0.74 | ±1.33                          | ±0.77 |       |
| <b>average</b>       | 81.87                                                         | 66.36 | 56.45 | 81.18 | 26.51 | 80.35 | 68.55 | 52.55 | 16.60 | 21.69 | 49.52                          | 18.10 |       |

Table 2: Performance comparison (mean±std, in terms of FPR95%) of various methods in CIFAR-100 (ID dataset) under WideResNet. The best and second-best models without accessing external outlier datasets are coloured red and blue, respectively.

| OOD dataset            | w/o outlier exposure (FPR95% ↓)                               |       |       |       |       |       |       |       |       |       | w/ outlier exposure (FPR95% ↓) |       |       |
|------------------------|---------------------------------------------------------------|-------|-------|-------|-------|-------|-------|-------|-------|-------|--------------------------------|-------|-------|
|                        | Msp/Odin/Mah/Energy/Gram/<br>Energy+ReAct/pNML/Odin+pNML/Ours |       |       |       |       |       |       |       |       |       | Oecc/Energy/<br>Oecc+pNML      |       |       |
| CIFAR-100 (WideResNet) | iSUN                                                          | 86.75 | 63.60 | 36.73 | 78.80 | 5.23  | 82.70 | 73.45 | 73.45 | 2.34  | 7.93                           | 55.97 | 3.01  |
|                        |                                                               | ±0.43 | ±0.64 | ±0.82 | ±0.66 | ±0.28 | ±0.57 | ±0.77 | ±0.59 | ±0.32 | ±0.64                          | ±1.37 | ±0.33 |
|                        | LSUN(R)                                                       | 85.75 | 60.50 | 34.66 | 79.40 | 2.97  | 82.95 | 77.55 | 77.55 | 1.08  | 5.41                           | 53.28 | 1.90  |
|                        |                                                               | ±0.64 | ±1.10 | ±0.78 | ±0.72 | ±0.29 | ±0.87 | ±0.85 | ±0.59 | ±0.21 | ±0.29                          | ±0.78 | ±0.27 |
|                        | LSUN(C)                                                       | 80.85 | 52.10 | 45.19 | 71.85 | 37.29 | 57.85 | 86.95 | 61.85 | 5.67  | 18.20                          | 29.25 | 6.70  |
|                        |                                                               | ±0.49 | ±1.12 | ±0.87 | ±0.90 | ±1.17 | ±0.60 | ±0.81 | ±1.13 | ±0.40 | ±0.86                          | ±0.76 | ±0.67 |
|                        | CIFAR-10                                                      | 81.85 | 85.90 | 90.45 | 77.85 | 90.41 | 87.90 | 98.45 | 97.60 | 88.49 | 88.52                          | 84.75 | 90.36 |
|                        |                                                               | ±0.62 | ±0.53 | ±0.96 | ±0.75 | ±0.56 | ±0.68 | ±0.29 | ±0.30 | ±0.62 | ±0.56                          | ±0.34 | ±0.70 |
|                        | ImageNet(R)                                                   | 84.90 | 63.95 | 34.06 | 78.95 | 6.01  | 83.60 | 71.55 | 71.55 | 3.34  | 12.04                          | 66.33 | 7.72  |
|                        |                                                               | ±0.97 | ±0.92 | ±0.69 | ±0.58 | ±0.28 | ±0.61 | ±0.85 | ±0.78 | ±0.24 | ±0.57                          | ±0.73 | ±0.58 |
|                        | ImageNet(C)                                                   | 82.55 | 65.30 | 46.77 | 71.05 | 12.98 | 76.80 | 79.40 | 79.90 | 3.48  | 15.84                          | 56.36 | 7.81  |
|                        |                                                               | ±0.80 | ±0.86 | ±0.70 | ±0.73 | ±0.27 | ±0.71 | ±0.45 | ±0.74 | ±0.32 | ±0.65                          | ±1.20 | ±0.38 |
|                        | Gaussian                                                      | 99.60 | 0.05  | 0.00  | 67.25 | 0.00  | 47.55 | 0.00  | 0.00  | 0.00  | 0.00                           | 0.00  | 0.00  |
|                        |                                                               | ±0.09 | ±0.00 | ±0.00 | ±0.63 | ±0.00 | ±0.68 | ±0.00 | ±0.00 | ±0.00 | ±0.00                          | ±0.00 | ±0.00 |
|                        | Places365                                                     | 83.80 | 78.80 | 52.73 | 81.05 | 46.27 | 72.50 | 82.45 | 62.60 | 11.27 | 23.26                          | 36.49 | 9.68  |
|                        |                                                               | ±0.61 | ±0.99 | ±0.94 | ±1.01 | ±0.67 | ±0.59 | ±0.22 | ±1.00 | ±0.61 | ±0.72                          | ±1.14 | ±0.60 |
|                        | Textures                                                      | 81.60 | 74.05 | 39.05 | 78.45 | 35.98 | 66.00 | 75.40 | 58.75 | 12.40 | 19.62                          | 38.03 | 8.10  |
|                        |                                                               | ±0.46 | ±1.08 | ±0.76 | ±0.88 | ±0.68 | ±0.71 | ±0.91 | ±0.81 | ±0.70 | ±0.68                          | ±1.36 | ±0.63 |
|                        | iNaturalist                                                   | 76.15 | 70.35 | 59.72 | 71.40 | 47.86 | 70.75 | 85.40 | 73.40 | 17.10 | 38.38                          | 62.70 | 24.92 |
|                        |                                                               | ±0.75 | ±1.02 | ±1.00 | ±0.84 | ±0.90 | ±0.87 | ±0.75 | ±1.25 | ±0.57 | ±1.18                          | ±0.93 | ±0.99 |
| SVHN                   | 77.30                                                         | 42.45 | 33.27 | 85.40 | 19.26 | 76.00 | 74.85 | 57.05 | 1.68  | 9.43  | 37.50                          | 3.64  |       |
|                        | ±0.96                                                         | ±0.88 | ±1.00 | ±0.62 | ±0.69 | ±0.96 | ±0.76 | ±0.57 | ±0.31 | ±0.75 | ±0.94                          | ±0.41 |       |
| <b>average</b>         | 83.74                                                         | 59.73 | 42.97 | 76.50 | 27.66 | 73.15 | 73.22 | 64.88 | 13.35 | 21.69 | 47.33                          | 14.89 |       |

Table 3: Performance comparison (mean±std, in terms of  $\text{FPR}_{95\%}$ ) of various methods in CIFAR-100 (ID dataset) under DenseNet. The best and second-best models without accessing external outlier datasets are coloured red and blue, respectively.

| OOD dataset          | w/o outlier exposure<br>( $\text{FPR}_{95\%} \downarrow$ )    |              |       |             |              |              |              |              |              |              | w/ outlier exposure<br>( $\text{FPR}_{95\%} \downarrow$ ) |       |       |
|----------------------|---------------------------------------------------------------|--------------|-------|-------------|--------------|--------------|--------------|--------------|--------------|--------------|-----------------------------------------------------------|-------|-------|
|                      | Msp/Odin/Mah/Energy/Gram/<br>Energy+ReAct/pNML/Odin+pNML/Ours |              |       |             |              |              |              |              |              |              | Oecc/Energy/<br>Oecc+pNML                                 |       |       |
| CIFAR-100 (DenseNet) | iSUN                                                          | 83.85        | 62.10 | 16.48       | 82.45        | <b>3.99</b>  | 40.35        | 18.40        | 16.20        | <b>5.66</b>  | 3.21                                                      | 76.09 | 0.92  |
|                      |                                                               | ±0.64        | ±0.86 | ±0.55       | ±0.68        | ±0.23        | ±0.80        | ±0.68        | ±0.80        | ±0.48        | ±0.25                                                     | ±0.77 | ±0.17 |
|                      | LSUN(R)                                                       | 82.75        | 58.55 | 13.48       | 77.45        | <b>2.38</b>  | 34.45        | 16.40        | 14.40        | <b>4.20</b>  | 1.98                                                      | 73.39 | 0.57  |
|                      |                                                               | ±0.71        | ±0.45 | ±0.78       | ±0.60        | ±0.19        | ±1.02        | ±0.64        | ±0.66        | ±0.53        | ±0.26                                                     | ±0.69 | ±0.18 |
|                      | LSUN(C)                                                       | 73.40        | 42.25 | 74.92       | 47.05        | <b>34.70</b> | 45.80        | 35.10        | 35.10        | <b>8.35</b>  | 26.35                                                     | 33.94 | 16.89 |
|                      |                                                               | ±1.04        | ±0.90 | ±0.63       | ±0.74        | ±1.06        | ±1.02        | ±0.88        | ±0.78        | ±0.59        | ±0.96                                                     | ±0.94 | ±0.84 |
|                      | CIFAR-10                                                      | <b>80.90</b> | 84.20 | 98.86       | 82.05        | 87.70        | <b>81.90</b> | 97.70        | 97.60        | 92.46        | 89.58                                                     | 86.30 | 91.82 |
|                      |                                                               | ±0.71        | ±0.48 | ±0.25       | ±0.42        | ±0.65        | ±0.48        | ±0.30        | ±0.18        | ±0.48        | ±0.43                                                     | ±0.22 | ±0.50 |
|                      | ImageNet(R)                                                   | 81.90        | 56.95 | 16.56       | 76.85        | <b>4.15</b>  | 39.70        | 13.55        | 11.95        | <b>2.83</b>  | 3.85                                                      | 75.50 | 1.19  |
|                      |                                                               | ±0.78        | ±1.23 | ±0.62       | ±0.64        | ±0.12        | ±0.51        | ±0.71        | ±0.52        | ±0.31        | ±0.22                                                     | ±0.52 | ±0.17 |
|                      | ImageNet(C)                                                   | 75.45        | 46.75 | 35.92       | 58.65        | <b>10.92</b> | 33.30        | 22.75        | 21.90        | <b>3.53</b>  | 8.09                                                      | 60.05 | 3.40  |
|                      |                                                               | ±0.77        | ±0.96 | ±1.14       | ±0.63        | ±0.44        | ±1.17        | ±0.50        | ±0.63        | ±0.33        | ±0.36                                                     | ±0.64 | ±0.36 |
|                      | Gaussian                                                      | 100.0        | 100.0 | <b>0.00</b> | 100.0        | <b>0.00</b>  | 100.0        | <b>0.00</b>  | <b>0.00</b>  | <b>0.00</b>  | 0.00                                                      | 100.0 | 0.00  |
|                      |                                                               | ±0.00        | ±0.08 | ±0.00       | ±0.00        | ±0.00        | ±0.00        | ±0.00        | ±0.00        | ±0.00        | ±0.00                                                     | ±0.00 | ±0.00 |
|                      | Places365                                                     | 76.15        | 51.80 | 81.42       | 58.20        | 45.56        | 53.00        | <b>36.35</b> | <b>36.35</b> | <b>15.18</b> | 41.32                                                     | 46.77 | 32.74 |
|                      |                                                               | ±1.08        | ±0.78 | ±0.62       | ±0.80        | ±0.84        | ±1.11        | ±0.78        | ±1.06        | ±0.44        | ±0.82                                                     | ±1.20 | ±0.81 |
|                      | Textures                                                      | 75.15        | 56.50 | 59.34       | 58.85        | 36.38        | 47.25        | <b>25.90</b> | <b>25.90</b> | <b>14.07</b> | 31.87                                                     | 48.95 | 23.20 |
|                      |                                                               | ±0.66        | ±0.71 | ±0.36       | ±1.13        | ±0.85        | ±0.88        | ±0.71        | ±0.47        | ±0.54        | ±0.98                                                     | ±0.82 | ±0.90 |
|                      | iNaturalist                                                   | 70.30        | 51.80 | 79.96       | 48.90        | 48.61        | <b>43.05</b> | 45.25        | 44.85        | <b>22.50</b> | 48.27                                                     | 64.23 | 44.94 |
|                      |                                                               | ±0.70        | ±0.71 | ±0.68       | ±0.72        | ±1.20        | ±0.83        | ±1.24        | ±0.28        | ±0.73        | ±0.86                                                     | ±0.68 | ±1.11 |
| SVHN                 | 73.75                                                         | 44.30        | 49.71 | 65.95       | <b>10.52</b> | 48.55        | 20.50        | 20.50        | <b>3.16</b>  | 11.63        | 69.06                                                     | 9.72  |       |
|                      | ±1.04                                                         | ±0.62        | ±1.38 | ±1.02       | ±0.44        | ±1.46        | ±1.10        | ±0.99        | ±0.37        | ±0.53        | ±0.72                                                     | ±0.58 |       |
| <b>average</b>       | 79.42                                                         | 59.56        | 47.88 | 68.76       | <b>25.90</b> | 51.58        | 30.17        | 29.52        | <b>15.63</b> | 24.20        | 66.75                                                     | 20.49 |       |

Table 4: Performance comparison (in terms of  $\text{AUROC}$ ) of various methods in CIFAR-100 (ID dataset) under ResNet34. The best and second-best models without accessing external outlier datasets are coloured red and blue, respectively.

| OOD dataset          | w/o outlier exposure<br>( $\text{FPR}_{95\%} \downarrow$ )    |              |       |       |              |              |       |              |              |              | w/ outlier exposure<br>( $\text{FPR}_{95\%} \downarrow$ ) |       |       |
|----------------------|---------------------------------------------------------------|--------------|-------|-------|--------------|--------------|-------|--------------|--------------|--------------|-----------------------------------------------------------|-------|-------|
|                      | Msp/Odin/Mah/Energy/Gram/<br>Energy+ReAct/pNML/Odin+pNML/Ours |              |       |       |              |              |       |              |              |              | Oecc/Energy/<br>Oecc+pNML                                 |       |       |
| CIFAR-100 (ResNet34) | iSUN                                                          | 75.94        | 85.67 | 82.53 | 78.16        | <b>98.96</b> | 78.29 | 83.37        | 87.92        | <b>98.98</b> | 99.04                                                     | 89.41 | 99.36 |
|                      |                                                               | ±0.33        | ±0.50 | ±0.30 | ±0.20        | ±0.08        | ±0.21 | ±0.28        | ±0.22        | ±0.10        | ±0.08                                                     | ±0.19 | ±0.06 |
|                      | LSUN(R)                                                       | 75.78        | 85.46 | 82.44 | 78.46        | <b>99.37</b> | 78.03 | 84.09        | 88.31        | <b>99.30</b> | 99.31                                                     | 89.99 | 99.55 |
|                      |                                                               | ±0.26        | ±0.32 | ±0.37 | ±0.28        | ±0.05        | ±0.25 | ±0.29        | ±0.28        | ±0.05        | ±0.03                                                     | ±0.23 | ±0.03 |
|                      | LSUN(C)                                                       | 75.45        | 82.60 | 88.19 | 75.37        | <b>92.25</b> | 78.93 | 82.94        | 88.22        | <b>98.54</b> | 95.74                                                     | 93.13 | 97.76 |
|                      |                                                               | ±0.53        | ±0.37 | ±0.30 | ±0.48        | ±0.25        | ±0.42 | ±0.41        | ±0.31        | ±0.09        | ±0.22                                                     | ±0.22 | ±0.14 |
|                      | CIFAR-10                                                      | <b>77.98</b> | 70.01 | 71.08 | 77.86        | 68.98        | 77.74 | <b>78.10</b> | 73.32        | 75.09        | 71.13                                                     | 80.65 | 75.83 |
|                      |                                                               | ±0.34        | ±0.38 | ±0.50 | ±0.29        | ±0.33        | ±0.28 | ±0.48        | ±0.39        | ±0.49        | ±0.27                                                     | ±0.30 | ±0.45 |
|                      | ImageNet(R)                                                   | 76.83        | 87.43 | 83.56 | 79.99        | <b>98.90</b> | 79.70 | 83.74        | 87.89        | <b>99.04</b> | 98.74                                                     | 88.19 | 98.89 |
|                      |                                                               | ±0.42        | ±0.27 | ±0.39 | ±0.15        | ±0.07        | ±0.13 | ±0.36        | ±0.23        | ±0.08        | ±0.06                                                     | ±0.15 | ±0.06 |
|                      | ImageNet(C)                                                   | 79.08        | 84.67 | 85.08 | 81.07        | <b>97.79</b> | 81.33 | 85.32        | 88.18        | <b>99.16</b> | 97.99                                                     | 89.04 | 98.16 |
|                      |                                                               | ±0.23        | ±0.23 | ±0.21 | ±0.44        | ±0.10        | ±0.44 | ±0.15        | ±0.13        | ±0.06        | ±0.08                                                     | ±0.21 | ±0.08 |
|                      | Gaussian                                                      | 45.29        | 84.02 | 96.15 | 45.56        | <b>99.99</b> | 51.65 | 86.72        | 95.83        | <b>100.0</b> | 99.98                                                     | 99.28 | 100.0 |
|                      |                                                               | ±0.21        | ±0.15 | ±0.10 | ±0.22        | ±0.00        | ±0.22 | ±0.15        | ±0.06        | ±0.00        | ±0.00                                                     | ±0.01 | ±0.00 |
|                      | Places365                                                     | 74.82        | 73.64 | 85.77 | 72.96        | <b>88.22</b> | 77.81 | 83.51        | 84.71        | <b>95.93</b> | 92.63                                                     | 92.18 | 95.67 |
|                      |                                                               | ±0.61        | ±0.53 | ±0.44 | ±0.44        | ±0.28        | ±0.34 | ±0.45        | ±0.32        | ±0.16        | ±0.24                                                     | ±0.11 | ±0.14 |
|                      | Textures                                                      | 76.92        | 77.17 | 86.04 | 77.73        | <b>91.96</b> | 80.73 | 85.68        | 86.13        | <b>96.49</b> | 94.34                                                     | 91.63 | 96.08 |
|                      |                                                               | ±0.24        | ±0.20 | ±0.18 | ±0.19        | ±0.28        | ±0.21 | ±0.25        | ±0.31        | ±0.14        | ±0.19                                                     | ±0.18 | ±0.19 |
|                      | iNaturalist                                                   | 82.00        | 82.43 | 87.25 | 82.39        | 88.82        | 84.35 | <b>89.25</b> | <b>89.25</b> | <b>94.40</b> | 89.12                                                     | 87.36 | 88.22 |
|                      |                                                               | ±0.40        | ±0.49 | ±0.29 | ±0.35        | ±0.34        | ±0.31 | ±0.26        | ±0.34        | ±0.13        | ±0.23                                                     | ±0.24 | ±0.29 |
| SVHN                 | 79.12                                                         | 93.42        | 94.06 | 79.43 | <b>95.94</b> | 82.72        | 90.78 | 94.92        | <b>99.67</b> | 96.88        | 93.37                                                     | 97.54 |       |
|                      | ±0.19                                                         | ±0.63        | ±0.34 | ±0.38 | ±0.13        | ±0.30        | ±0.19 | ±0.44        | ±0.05        | ±0.19        | ±0.09                                                     | ±0.15 |       |
| <b>average</b>       | 74.47                                                         | 82.41        | 85.65 | 75.36 | <b>92.83</b> | 77.39        | 84.86 | 87.70        | <b>96.05</b> | 94.08        | 90.38                                                     | 95.19 |       |

Table 5: Performance comparison (in terms of AUROC) of various methods in CIFAR-100 (ID dataset) under WideResNet. The best and second-best models without accessing external outlier datasets are coloured red and blue, respectively.

| OOD dataset            | w/o outlier exposure (FPR95% ↓)                               |       |       |       |       |       |       |       |       |       | w/ outlier exposure (FPR95% ↓) |       |       |
|------------------------|---------------------------------------------------------------|-------|-------|-------|-------|-------|-------|-------|-------|-------|--------------------------------|-------|-------|
|                        | Msp/Odin/Mah/Energy/Gram/<br>Energy+ReAct/pNML/Odin+pNML/Ours |       |       |       |       |       |       |       |       |       | Oecc/Energy/<br>Oecc+pNML      |       |       |
| CIFAR-100 (WideResNet) | iSUN                                                          | 69.62 | 83.64 | 91.98 | 79.48 | 98.87 | 71.98 | 78.11 | 78.11 | 99.41 | 98.49                          | 89.26 | 99.25 |
|                        |                                                               | ±0.49 | ±0.21 | ±0.15 | ±0.41 | ±0.06 | ±0.36 | ±0.50 | ±0.11 | ±0.05 | ±0.10                          | ±0.25 | ±0.06 |
|                        | LSUN(R)                                                       | 69.22 | 83.40 | 93.24 | 79.39 | 99.34 | 72.40 | 78.02 | 78.02 | 99.68 | 98.83                          | 89.89 | 99.48 |
|                        |                                                               | ±0.37 | ±0.30 | ±0.24 | ±0.28 | ±0.05 | ±0.39 | ±0.34 | ±0.15 | ±0.03 | ±0.07                          | ±0.22 | ±0.04 |
|                        | LSUN(C)                                                       | 77.07 | 86.63 | 88.38 | 83.47 | 90.96 | 85.93 | 57.43 | 80.17 | 98.78 | 96.16                          | 95.05 | 98.56 |
|                        |                                                               | ±0.40 | ±0.30 | ±0.32 | ±0.33 | ±0.34 | ±0.20 | ±0.42 | ±0.17 | ±0.05 | ±0.26                          | ±0.15 | ±0.15 |
|                        | CIFAR-10                                                      | 75.96 | 68.89 | 65.82 | 79.31 | 64.53 | 65.81 | 43.12 | 46.92 | 69.68 | 68.87                          | 78.35 | 62.98 |
|                        |                                                               | ±0.27 | ±0.46 | ±0.34 | ±0.39 | ±0.71 | ±0.54 | ±0.60 | ±0.41 | ±0.55 | ±0.43                          | ±0.16 | ±0.52 |
|                        | ImageNet(R)                                                   | 68.77 | 82.23 | 92.89 | 78.12 | 98.61 | 70.79 | 77.61 | 77.61 | 99.11 | 97.78                          | 84.90 | 98.57 |
|                        |                                                               | ±0.44 | ±0.36 | ±0.16 | ±0.38 | ±0.05 | ±0.41 | ±0.28 | ±0.15 | ±0.06 | ±0.09                          | ±0.39 | ±0.08 |
|                        | ImageNet(C)                                                   | 72.59 | 82.80 | 89.87 | 81.62 | 97.17 | 75.36 | 68.97 | 70.35 | 99.10 | 97.24                          | 87.63 | 98.43 |
|                        |                                                               | ±0.39 | ±0.32 | ±0.28 | ±0.34 | ±0.12 | ±0.49 | ±0.59 | ±0.13 | ±0.06 | ±0.08                          | ±0.41 | ±0.08 |
|                        | Gaussian                                                      | 75.99 | 99.23 | 100.0 | 91.47 | 100.0 | 91.31 | 99.99 | 100.0 | 99.96 | 99.99                          | 99.91 | 100.0 |
|                        |                                                               | ±0.20 | ±0.15 | ±0.00 | ±0.12 | ±0.00 | ±0.16 | ±0.00 | ±0.00 | ±0.00 | ±0.00                          | ±0.00 | ±0.00 |
|                        | Places365                                                     | 74.64 | 78.21 | 85.97 | 77.17 | 86.78 | 79.23 | 64.27 | 80.44 | 97.65 | 94.93                          | 93.87 | 97.94 |
|                        |                                                               | ±0.39 | ±0.36 | ±0.33 | ±0.55 | ±0.26 | ±0.35 | ±0.51 | ±0.29 | ±0.10 | ±0.17                          | ±0.17 | ±0.11 |
|                        | Textures                                                      | 74.63 | 79.10 | 91.24 | 77.89 | 91.25 | 83.28 | 70.01 | 81.17 | 97.24 | 96.32                          | 92.89 | 98.51 |
|                        |                                                               | ±0.33 | ±0.36 | ±0.21 | ±0.43 | ±0.23 | ±0.32 | ±0.79 | ±0.19 | ±0.11 | ±0.14                          | ±0.22 | ±0.10 |
|                        | iNaturalist                                                   | 78.90 | 83.13 | 85.71 | 83.38 | 87.02 | 80.36 | 62.25 | 71.58 | 96.78 | 91.97                          | 88.23 | 95.32 |
|                        |                                                               | ±0.27 | ±0.34 | ±0.31 | ±0.40 | ±0.58 | ±0.23 | ±0.56 | ±0.27 | ±0.09 | ±0.32                          | ±0.28 | ±0.27 |
| SVHN                   | 78.61                                                         | 91.86 | 93.22 | 73.95 | 96.05 | 87.39 | 78.73 | 80.42 | 99.63 | 97.93 | 93.72                          | 99.08 |       |
|                        | ±0.40                                                         | ±0.26 | ±0.18 | ±0.36 | ±0.15 | ±0.29 | ±0.52 | ±0.08 | ±0.05 | ±0.10 | ±0.14                          | ±0.05 |       |
| <b>average</b>         | 74.18                                                         | 83.56 | 88.94 | 80.48 | 91.87 | 78.53 | 70.77 | 76.80 | 96.09 | 94.41 | 90.34                          | 95.28 |       |

Table 6: Performance comparison (in terms of AUROC) of various methods in CIFAR-100 (ID dataset) under DenseNet. The best and second-best models without accessing external outlier datasets are coloured red and blue, respectively.

| OOD dataset          | w/o outlier exposure (FPR95% ↓)                               |       |       |       |       |       |       |       |       |       | w/ outlier exposure (FPR95% ↓) |       |       |
|----------------------|---------------------------------------------------------------|-------|-------|-------|-------|-------|-------|-------|-------|-------|--------------------------------|-------|-------|
|                      | Msp/Odin/Mah/Energy/Gram/<br>Energy+ReAct/pNML/Odin+pNML/Ours |       |       |       |       |       |       |       |       |       | Oecc/Energy/<br>Oecc+pNML      |       |       |
| CIFAR-100 (DenseNet) | iSUN                                                          | 70.31 | 84.84 | 96.42 | 77.20 | 99.07 | 93.20 | 96.46 | 96.77 | 98.86 | 99.04                          | 82.00 | 99.49 |
|                      |                                                               | ±0.24 | ±0.48 | ±0.09 | ±0.39 | ±0.04 | ±0.12 | ±0.09 | ±0.52 | ±0.06 | ±0.06                          | ±0.26 | ±0.04 |
|                      | LSUN(R)                                                       | 70.84 | 85.68 | 97.15 | 79.49 | 99.36 | 94.37 | 96.78 | 97.12 | 99.03 | 99.30                          | 83.17 | 99.59 |
|                      |                                                               | ±0.59 | ±0.25 | ±0.16 | ±0.28 | ±0.04 | ±0.21 | ±0.16 | ±0.22 | ±0.06 | ±0.05                          | ±0.23 | ±0.03 |
|                      | LSUN(C)                                                       | 79.99 | 91.16 | 73.12 | 90.48 | 91.55 | 90.91 | 92.84 | 92.84 | 98.32 | 93.86                          | 94.18 | 95.92 |
|                      |                                                               | ±0.32 | ±0.42 | ±0.46 | ±0.19 | ±0.31 | ±0.20 | ±0.16 | ±0.72 | ±0.07 | ±0.28                          | ±0.18 | ±0.24 |
|                      | CIFAR-10                                                      | 76.61 | 73.56 | 50.48 | 76.75 | 65.24 | 75.64 | 49.87 | 50.43 | 61.65 | 63.02                          | 75.61 | 59.80 |
|                      |                                                               | ±0.65 | ±0.58 | ±0.56 | ±0.42 | ±0.73 | ±0.43 | ±0.57 | ±0.53 | ±0.61 | ±0.52                          | ±0.37 | ±0.52 |
|                      | ImageNet(R)                                                   | 71.15 | 85.25 | 96.22 | 78.51 | 98.94 | 93.71 | 97.26 | 97.52 | 99.35 | 98.89                          | 81.19 | 99.42 |
|                      |                                                               | ±0.50 | ±0.54 | ±0.20 | ±0.44 | ±0.02 | ±0.17 | ±0.12 | ±0.36 | ±0.03 | ±0.04                          | ±0.38 | ±0.03 |
|                      | ImageNet(C)                                                   | 76.32 | 88.88 | 90.99 | 85.02 | 97.64 | 94.42 | 95.63 | 95.88 | 99.19 | 98.18                          | 86.71 | 98.97 |
|                      |                                                               | ±0.39 | ±0.43 | ±0.32 | ±0.35 | ±0.09 | ±0.21 | ±0.12 | ±0.45 | ±0.05 | ±0.08                          | ±0.30 | ±0.06 |
|                      | Gaussian                                                      | 30.65 | 50.50 | 100.0 | 15.34 | 100.0 | 61.56 | 100.0 | 100.0 | 99.99 | 99.99                          | 65.24 | 100.0 |
|                      |                                                               | ±0.08 | ±0.01 | ±0.00 | ±0.06 | ±0.00 | ±0.13 | ±0.00 | ±0.00 | ±0.00 | ±0.00                          | ±0.17 | ±0.00 |
|                      | Places365                                                     | 79.51 | 89.30 | 66.06 | 89.49 | 86.91 | 89.64 | 92.96 | 92.96 | 97.24 | 88.58                          | 92.58 | 91.74 |
|                      |                                                               | ±0.36 | ±0.31 | ±0.54 | ±0.20 | ±0.23 | ±0.28 | ±0.20 | ±0.65 | ±0.10 | ±0.23                          | ±0.18 | ±0.18 |
|                      | Textures                                                      | 77.92 | 87.49 | 81.30 | 86.53 | 90.40 | 90.15 | 95.19 | 95.19 | 96.71 | 91.44                          | 90.74 | 94.05 |
|                      |                                                               | ±0.42 | ±0.27 | ±0.40 | ±0.34 | ±0.21 | ±0.28 | ±0.16 | ±0.46 | ±0.14 | ±0.26                          | ±0.26 | ±0.23 |
|                      | iNaturalist                                                   | 82.62 | 90.93 | 69.00 | 91.19 | 85.87 | 91.72 | 89.82 | 89.89 | 96.00 | 86.63                          | 88.31 | 88.04 |
|                      |                                                               | ±0.33 | ±0.49 | ±0.53 | ±0.14 | ±0.50 | ±0.14 | ±0.34 | ±0.42 | ±0.07 | ±0.45                          | ±0.17 | ±0.44 |
| SVHN                 | 82.12                                                         | 92.45 | 87.56 | 87.79 | 97.20 | 91.93 | 96.32 | 96.32 | 99.18 | 96.80 | 89.69                          | 97.28 |       |
|                      | ±0.24                                                         | ±0.17 | ±0.48 | ±0.21 | ±0.11 | ±0.20 | ±0.17 | ±0.42 | ±0.13 | ±0.17 | ±0.17                          | ±0.14 |       |
| <b>average</b>       | 72.55                                                         | 83.64 | 82.57 | 77.98 | 92.02 | 87.93 | 91.19 | 91.36 | 95.05 | 92.34 | 84.49                          | 93.12 |       |

Table 7: Performance comparison (in terms of AUPR) of various methods in CIFAR-100 (ID dataset) under ResNet34. The best and second-best models without accessing external outlier datasets are coloured red and blue, respectively.

| OOD dataset          | w/o outlier exposure (FPR95% ↓)                               |       |       |       |       |       |       |       |       |       | w/ outlier exposure (FPR95% ↓) |       |       |
|----------------------|---------------------------------------------------------------|-------|-------|-------|-------|-------|-------|-------|-------|-------|--------------------------------|-------|-------|
|                      | Msp/Odin/Mah/Energy/Gram/<br>Energy+ReAct/pNML/Odin+pNML/Ours |       |       |       |       |       |       |       |       |       | Oecc/Energy/<br>Oecc+pNML      |       |       |
| CIFAR-100 (ResNet34) | iSUN                                                          | 94.11 | 96.21 | 95.72 | 94.49 | 99.74 | 94.70 | 96.24 | 97.24 | 99.78 | 99.77                          | 97.68 | 99.86 |
|                      |                                                               | ±0.13 | ±0.21 | ±0.08 | ±0.07 | ±0.03 | ±0.08 | ±0.09 | ±0.06 | ±0.03 | ±0.04                          | ±0.06 | ±0.02 |
|                      | LSUN(R)                                                       | 93.93 | 96.13 | 95.77 | 94.49 | 99.86 | 94.43 | 96.42 | 97.37 | 99.85 | 99.85                          | 97.87 | 99.90 |
|                      |                                                               | ±0.12 | ±0.14 | ±0.09 | ±0.10 | ±0.01 | ±0.08 | ±0.10 | ±0.08 | ±0.01 | ±0.01                          | ±0.06 | ±0.01 |
|                      | LSUN(C)                                                       | 93.76 | 94.82 | 97.00 | 93.52 | 97.91 | 95.12 | 95.87 | 97.08 | 99.69 | 98.88                          | 98.52 | 99.44 |
|                      |                                                               | ±0.20 | ±0.13 | ±0.10 | ±0.17 | ±0.10 | ±0.12 | ±0.15 | ±0.08 | ±0.02 | ±0.08                          | ±0.06 | ±0.05 |
|                      | CIFAR-10                                                      | 94.50 | 91.23 | 91.31 | 94.51 | 90.59 | 94.37 | 94.02 | 91.88 | 93.47 | 91.05                          | 95.57 | 92.80 |
|                      |                                                               | ±0.09 | ±0.15 | ±0.24 | ±0.12 | ±0.13 | ±0.10 | ±0.22 | ±0.28 | ±0.19 | ±0.14                          | ±0.09 | ±0.24 |
|                      | ImageNet(R)                                                   | 94.48 | 96.92 | 96.04 | 95.15 | 99.74 | 95.10 | 96.28 | 97.19 | 99.79 | 99.72                          | 97.49 | 99.75 |
|                      |                                                               | ±0.13 | ±0.09 | ±0.12 | ±0.04 | ±0.02 | ±0.05 | ±0.10 | ±0.08 | ±0.02 | ±0.02                          | ±0.05 | ±0.02 |
|                      | ImageNet(C)                                                   | 94.91 | 95.82 | 96.39 | 95.27 | 99.44 | 95.48 | 96.65 | 97.29 | 99.82 | 99.54                          | 97.67 | 99.57 |
|                      |                                                               | ±0.10 | ±0.12 | ±0.07 | ±0.12 | ±0.03 | ±0.12 | ±0.05 | ±0.04 | ±0.01 | ±0.02                          | ±0.05 | ±0.02 |
|                      | Gaussian                                                      | 86.72 | 96.87 | 99.28 | 86.66 | 100.0 | 88.86 | 97.43 | 99.23 | 100.0 | 100.0                          | 99.87 | 100.0 |
|                      |                                                               | ±0.07 | ±0.04 | ±0.02 | ±0.09 | ±0.00 | ±0.08 | ±0.03 | ±0.01 | ±0.00 | ±0.00                          | ±0.00 | ±0.00 |
|                      | Places365                                                     | 93.01 | 92.40 | 96.63 | 92.24 | 96.56 | 94.74 | 95.98 | 96.33 | 99.09 | 97.97                          | 98.26 | 98.85 |
|                      |                                                               | ±0.27 | ±0.27 | ±0.14 | ±0.21 | ±0.11 | ±0.13 | ±0.16 | ±0.13 | ±0.04 | ±0.08                          | ±0.04 | ±0.04 |
|                      | Textures                                                      | 93.51 | 93.43 | 96.65 | 93.85 | 97.74 | 95.43 | 96.49 | 96.59 | 99.21 | 98.49                          | 98.15 | 98.94 |
|                      |                                                               | ±0.12 | ±0.15 | ±0.06 | ±0.14 | ±0.11 | ±0.09 | ±0.09 | ±0.11 | ±0.04 | ±0.08                          | ±0.06 | ±0.07 |
|                      | iNaturalist                                                   | 95.43 | 95.41 | 97.11 | 95.43 | 96.80 | 96.40 | 97.66 | 97.66 | 98.78 | 97.02                          | 97.29 | 96.73 |
|                      |                                                               | ±0.15 | ±0.18 | ±0.09 | ±0.14 | ±0.16 | ±0.10 | ±0.07 | ±0.09 | ±0.03 | ±0.09                          | ±0.07 | ±0.11 |
| SVHN                 | 94.84                                                         | 98.58 | 98.70 | 94.94 | 98.95 | 96.13 | 98.01 | 98.88 | 99.92 | 99.21 | 98.64                          | 99.40 |       |
|                      | ±0.09                                                         | ±0.26 | ±0.08 | ±0.18 | ±0.04 | ±0.11 | ±0.05 | ±0.13 | ±0.01 | ±0.07 | ±0.02                          | ±0.05 |       |
| <b>average</b>       | 93.56                                                         | 95.26 | 96.42 | 93.69 | 97.94 | 94.61 | 96.46 | 96.98 | 99.04 | 98.32 | 97.91                          | 98.66 |       |

Table 8: Performance comparison (in terms of AUPR) of various methods in CIFAR-100 (ID dataset) under WideResNet. The best and second-best models without accessing external outlier datasets are coloured red and blue, respectively.

| OOD dataset            | w/o outlier exposure (FPR95% ↓)                               |       |       |       |       |       |       |       |       |       | w/ outlier exposure (FPR95% ↓) |       |       |
|------------------------|---------------------------------------------------------------|-------|-------|-------|-------|-------|-------|-------|-------|-------|--------------------------------|-------|-------|
|                        | Msp/Odin/Mah/Energy/Gram/<br>Energy+ReAct/pNML/Odin+pNML/Ours |       |       |       |       |       |       |       |       |       | Oecc/Energy/<br>Oecc+pNML      |       |       |
| CIFAR-100 (WideResNet) | iSUN                                                          | 92.05 | 95.93 | 98.11 | 95.07 | 99.71 | 92.87 | 94.26 | 94.26 | 99.87 | 99.63                          | 97.65 | 99.82 |
|                        |                                                               | ±0.19 | ±0.07 | ±0.07 | ±0.14 | ±0.02 | ±0.12 | ±0.17 | ±0.02 | ±0.01 | ±0.04                          | ±0.06 | ±0.02 |
|                        | LSUN(R)                                                       | 91.82 | 95.82 | 98.51 | 95.07 | 99.84 | 92.95 | 94.38 | 94.38 | 99.93 | 99.74                          | 97.80 | 99.89 |
|                        |                                                               | ±0.11 | ±0.08 | ±0.06 | ±0.10 | ±0.02 | ±0.12 | ±0.13 | ±0.04 | ±0.01 | ±0.02                          | ±0.05 | ±0.01 |
|                        | LSUN(C)                                                       | 94.48 | 96.68 | 97.08 | 96.14 | 97.45 | 96.60 | 85.54 | 94.25 | 99.74 | 98.88                          | 98.94 | 99.64 |
|                        |                                                               | ±0.12 | ±0.09 | ±0.11 | ±0.09 | ±0.11 | ±0.09 | ±0.16 | ±0.05 | ±0.01 | ±0.11                          | ±0.04 | ±0.05 |
|                        | CIFAR-10                                                      | 94.24 | 91.45 | 89.85 | 94.93 | 88.52 | 90.13 | 80.97 | 82.24 | 91.10 | 90.63                          | 95.00 | 87.98 |
|                        |                                                               | ±0.08 | ±0.19 | ±0.16 | ±0.13 | ±0.29 | ±0.27 | ±0.21 | ±0.19 | ±0.21 | ±0.22                          | ±0.07 | ±0.23 |
|                        | ImageNet(R)                                                   | 91.50 | 95.49 | 98.39 | 94.39 | 99.63 | 92.41 | 93.91 | 93.91 | 99.80 | 99.49                          | 96.46 | 99.68 |
|                        |                                                               | ±0.19 | ±0.11 | ±0.05 | ±0.16 | ±0.01 | ±0.15 | ±0.11 | ±0.04 | ±0.02 | ±0.03                          | ±0.13 | ±0.02 |
|                        | ImageNet(C)                                                   | 92.84 | 95.70 | 97.68 | 95.44 | 99.27 | 93.74 | 90.58 | 90.94 | 99.80 | 99.35                          | 97.10 | 99.63 |
|                        |                                                               | ±0.14 | ±0.11 | ±0.09 | ±0.13 | ±0.04 | ±0.15 | ±0.22 | ±0.03 | ±0.02 | ±0.03                          | ±0.11 | ±0.02 |
|                        | Gaussian                                                      | 95.10 | 99.86 | 100.0 | 98.37 | 100.0 | 98.20 | 100.0 | 100.0 | 99.99 | 100.0                          | 99.98 | 100.0 |
|                        |                                                               | ±0.04 | ±0.06 | ±0.00 | ±0.03 | ±0.00 | ±0.04 | ±0.00 | ±0.00 | ±0.00 | ±0.00                          | ±0.00 | ±0.00 |
|                        | Places365                                                     | 93.61 | 94.47 | 96.50 | 94.45 | 96.04 | 94.85 | 88.75 | 94.40 | 99.49 | 98.53                          | 98.70 | 99.46 |
|                        |                                                               | ±0.14 | ±0.10 | ±0.11 | ±0.15 | ±0.11 | ±0.12 | ±0.24 | ±0.08 | ±0.03 | ±0.08                          | ±0.04 | ±0.04 |
|                        | Textures                                                      | 93.25 | 94.46 | 97.90 | 94.32 | 97.50 | 96.00 | 91.02 | 94.50 | 99.37 | 99.08                          | 98.42 | 99.65 |
|                        |                                                               | ±0.16 | ±0.16 | ±0.08 | ±0.13 | ±0.10 | ±0.11 | ±0.29 | ±0.05 | ±0.03 | ±0.04                          | ±0.06 | ±0.03 |
|                        | iNaturalist                                                   | 94.98 | 95.96 | 96.67 | 96.05 | 96.19 | 95.26 | 88.07 | 91.44 | 99.32 | 97.89                          | 97.45 | 98.81 |
|                        |                                                               | ±0.09 | ±0.09 | ±0.10 | ±0.15 | ±0.21 | ±0.08 | ±0.29 | ±0.08 | ±0.02 | ±0.12                          | ±0.07 | ±0.08 |
| SVHN                   | 95.08                                                         | 98.22 | 98.47 | 93.59 | 98.96 | 97.38 | 94.50 | 94.16 | 99.91 | 99.45 | 98.68                          | 99.77 |       |
|                        | ±0.10                                                         | ±0.08 | ±0.05 | ±0.10 | ±0.06 | ±0.08 | ±0.16 | ±0.02 | ±0.01 | ±0.03 | ±0.04                          | ±0.01 |       |
| <b>average</b>         | 93.54                                                         | 95.82 | 97.20 | 95.26 | 97.56 | 94.58 | 91.09 | 93.13 | 98.94 | 98.42 | 97.83                          | 98.58 |       |

Table 9: Performance comparison (in terms of AUPR) of various methods in CIFAR-100 (ID dataset) under DenseNet. The best and second-best models without accessing external outlier datasets are coloured red and blue, respectively.

| OOD dataset          | w/o outlier exposure (FPR95% ↓)                               |              |       |              |              |              |              |              |              | w/ outlier exposure (FPR95% ↓) |        |       |       |
|----------------------|---------------------------------------------------------------|--------------|-------|--------------|--------------|--------------|--------------|--------------|--------------|--------------------------------|--------|-------|-------|
|                      | Msp/Odin/Mah/Energy/Gram/<br>Energy+ReAct/pNML/Odin+pNML/Ours |              |       |              |              |              |              |              |              | Oecc/Energy/<br>Oecc+pNML      |        |       |       |
| CIFAR-100 (DenseNet) | iSUN                                                          | 92.41        | 96.42 | 99.17        | 94.44        | <b>99.77</b> | 98.56        | 99.23        | 99.31        | <b>99.77</b>                   | 99.77  | 95.94 | 99.89 |
|                      |                                                               | ±0.08        | ±0.16 | ±0.03        | ±0.12        | ±0.01        | ±0.03        | ±0.02        | ±0.22        | ±0.01                          | ±0.03  | ±0.06 | ±0.02 |
|                      | LSUN(R)                                                       | 92.63        | 96.58 | 99.39        | 95.08        | <b>99.83</b> | 98.84        | 99.31        | 99.39        | <b>99.80</b>                   | 99.84  | 96.22 | 99.92 |
|                      |                                                               | ±0.16        | ±0.07 | ±0.04        | ±0.09        | ±0.01        | ±0.05        | ±0.04        | ±0.11        | ±0.01                          | ±0.01  | ±0.07 | ±0.01 |
|                      | LSUN(C)                                                       | 95.22        | 97.96 | 92.36        | 97.86        | 97.63        | 97.95        | <b>98.38</b> | <b>98.38</b> | <b>99.64</b>                   | 98.26  | 98.77 | 98.87 |
|                      |                                                               | ±0.10        | ±0.13 | ±0.15        | ±0.06        | ±0.09        | ±0.05        | ±0.04        | ±0.33        | ±0.02                          | ±0.12  | ±0.04 | ±0.08 |
|                      | CIFAR-10                                                      | <b>94.36</b> | 92.93 | 85.25        | <b>93.87</b> | 88.96        | 93.78        | 84.22        | 84.41        | 86.56                          | 87.87  | 94.21 | 86.64 |
|                      |                                                               | ±0.19        | ±0.20 | ±0.23        | ±0.14        | ±0.29        | ±0.13        | ±0.33        | ±0.21        | ±0.33                          | ±0.26  | ±0.10 | ±0.26 |
|                      | ImageNet(R)                                                   | 92.59        | 96.39 | 99.09        | 94.57        | <b>99.72</b> | 98.71        | 99.41        | 99.47        | <b>99.87</b>                   | 99.74  | 95.64 | 99.88 |
|                      |                                                               | ±0.17        | ±0.16 | ±0.07        | ±0.14        | ±0.01        | ±0.05        | ±0.03        | ±0.15        | ±0.01                          | ±0.01  | ±0.10 | ±0.01 |
|                      | ImageNet(C)                                                   | 94.06        | 97.34 | 97.70        | 96.26        | <b>99.41</b> | 98.85        | 99.05        | 99.11        | <b>99.84</b>                   | 99.57  | 96.97 | 99.77 |
|                      |                                                               | ±0.12        | ±0.14 | ±0.11        | ±0.13        | ±0.03        | ±0.05        | ±0.03        | ±0.21        | ±0.01                          | ±0.03  | ±0.09 | ±0.02 |
|                      | Gaussian                                                      | 81.88        | 88.83 | <b>100.0</b> | 74.17        | <b>100.0</b> | 91.93        | <b>100.0</b> | <b>100.0</b> | <b>100.0</b>                   | 100.0  | 92.71 | 100.0 |
|                      |                                                               | ±0.03        | ±0.00 | ±0.00        | ±0.05        | ±0.00        | ±0.04        | ±0.00        | ±0.00        | ±0.00                          | ±0.00  | ±0.05 | ±0.00 |
|                      | Places365                                                     | 95.22        | 97.62 | 89.55        | 97.74        | 96.08        | 97.73        | <b>98.46</b> | <b>98.46</b> | <b>99.42</b>                   | 96.58  | 98.47 | 97.66 |
|                      |                                                               | ±0.09        | ±0.11 | ±0.20        | ±0.05        | ±0.09        | ±0.07        | ±0.05        | ±0.33        | ±0.02                          | ±±0.09 | ±0.04 | ±0.08 |
|                      | Textures                                                      | 94.38        | 96.94 | 94.72        | 96.55        | 97.14        | 97.68        | <b>98.97</b> | <b>98.97</b> | <b>99.17</b>                   | 97.48  | 97.91 | 98.31 |
|                      |                                                               | ±0.14        | ±0.12 | ±0.20        | ±0.13        | ±0.09        | ±0.08        | ±0.04        | ±0.20        | ±0.04                          | ±±0.09 | ±0.08 | ±0.07 |
|                      | iNaturalist                                                   | 96.06        | 98.08 | 90.76        | 98.10        | 95.72        | <b>98.16</b> | 97.64        | 97.66        | <b>99.16</b>                   | 96.04  | 97.48 | 96.52 |
|                      |                                                               | ±0.10        | ±0.16 | ±0.25        | ±0.04        | ±0.17        | ±0.03        | ±0.10        | ±0.23        | ±0.02                          | ±±0.17 | ±0.04 | ±0.16 |
| SVHN                 | 96.02                                                         | 98.40        | 96.89 | 97.39        | 99.16        | 98.34        | <b>99.24</b> | <b>99.24</b> | <b>99.79</b> | 99.04                          | 97.94  | 99.24 |       |
|                      | ±0.05                                                         | ±0.05        | ±0.14 | ±0.05        | ±0.04        | ±0.04        | ±0.04        | ±0.17        | ±0.04        | ±±0.07                         | ±0.04  | ±0.06 |       |
| <b>average</b>       | 93.17                                                         | 96.14        | 94.99 | 94.18        | 97.58        | 97.32        | 97.63        | <b>97.67</b> | <b>98.46</b> | 97.65                          | 96.57  | 97.88 |       |



## A.6 FPR95%, AUROC and AUPR for CIFAR-10 experiment

Tables 10, 11, and 12 below demonstrate FPR95%, AUROC, and AUPR values, respectively, for different models in the CIFAR-10 experiments.

Table 10: Performance comparison (in terms of FPR95%) of various methods in CIFAR-10 (ID dataset) under three commonly-used networks. The best and second-best models without accessing external outlier datasets are coloured red and blue, respectively.

| OOD dataset         | w/o outlier exposure (FPR95% ↓)                               |                                                 |                                                         |                    |                       |  |  |  | w/ outlier exposure (FPR95% ↓) |  |  |
|---------------------|---------------------------------------------------------------|-------------------------------------------------|---------------------------------------------------------|--------------------|-----------------------|--|--|--|--------------------------------|--|--|
|                     | Msp/Odin/Mah/Energy/Gram/<br>Energy+ReAct/pNML/Odin+pNML/Ours |                                                 |                                                         |                    |                       |  |  |  | Oecc/Energy/<br>Oecc+pNML      |  |  |
| CIFAR-10 (ResNet34) | iSUN                                                          | 56.20 / 27.10 / 18.89 / 37.35 /                 | <b>0.50</b> / 36.75 / 22.00 / 13.50 /                   | <b>0.60</b>        | 0.19 / 4.08 / 0.00    |  |  |  |                                |  |  |
|                     | LSUN(R)                                                       | 53.20 / 24.95 / 17.03 / 35.35 /                 | <b>0.46</b> / 35.15 / 18.75 / 10.90 /                   | <b>0.52</b>        | 0.19 / 3.18 / 0.00    |  |  |  |                                |  |  |
|                     | LSUN(C)                                                       | 52.50 / 36.35 / 37.90 / 34.05 /                 | <b>9.84</b> / 33.95 / 27.40 / 24.80 /                   | <b>1.63</b>        | 4.06 / 3.81 / 1.42    |  |  |  |                                |  |  |
|                     | CIFAR-100                                                     | 65.05 / 57.10 / 58.23 / 56.70 / 65.73 / 56.40 / | <b>51.70</b> / 52.70 /                                  | <b>46.71</b>       | 45.05 / 28.57 / 23.07 |  |  |  |                                |  |  |
|                     | ImageNet(R)                                                   | 57.20 / 30.20 / 25.17 / 39.85 /                 | <b>1.19</b> / 39.55 / 27.95 / 20.15 /                   | <b>1.23</b>        | 0.49 / 8.49 / 0.11    |  |  |  |                                |  |  |
|                     | ImageNet(C)                                                   | 54.80 / 34.10 / 30.04 / 37.45 /                 | <b>2.51</b> / 37.15 / 28.65 / 22.10 /                   | <b>0.82</b>        | 1.03 / 7.18 / 0.20    |  |  |  |                                |  |  |
|                     | Gaussian                                                      | 10.30 / <b>0.00</b> / <b>0.00</b> / 1.00 /      | <b>0.00</b> / 1.00 / <b>0.00</b> / <b>0.00</b> /        | <b>0.00</b>        | 0.00 / 0.00 / 0.00    |  |  |  |                                |  |  |
|                     | Places365                                                     | 53.80 / 38.65 / 39.66 / 38.05 /                 | <b>10.54</b> / 37.85 / 27.70 / 27.70 /                  | <b>5.35</b>        | 4.54 / 4.54 / 0.96    |  |  |  |                                |  |  |
|                     | Textures                                                      | 61.75 / 49.60 / 40.14 / 45.20 /                 | <b>11.12</b> / 44.95 / 34.65 / 34.65 /                  | <b>6.01</b>        | 3.80 / 5.34 / 0.88    |  |  |  |                                |  |  |
|                     | iNaturalist                                                   | 54.95 / 43.00 / 42.27 / 40.05 /                 | <b>25.18</b> / 39.95 / 34.25 / 34.25 /                  | <b>5.36</b>        | 15.40 / 10.34 / 3.08  |  |  |  |                                |  |  |
|                     | SVHN                                                          | 67.75 / 17.40 / 42.11 / 52.20 /                 | <b>2.71</b> / 52.30 / 32.15 / 9.50 /                    | <b>0.49</b>        | 0.97 / 2.09 / 0.11    |  |  |  |                                |  |  |
| <b>average</b>      | 53.41 / 32.59 / 31.95 / 37.93 /                               | <b>11.80</b> / 37.73 / 27.75 / 22.75 /          | <b>6.25</b>                                             | 6.88 / 7.06 / 2.71 |                       |  |  |  |                                |  |  |
| CIFAR-10 (WRN)      | iSUN                                                          | 53.70 / 21.85 / 37.22 / 34.30 /                 | <b>1.02</b> / 42.30 / 20.85 / 18.20 /                   | <b>0.26</b>        | 0.16 / 1.91 / 0.00    |  |  |  |                                |  |  |
|                     | LSUN(R)                                                       | 50.55 / 18.10 / 35.91 / 28.30 /                 | <b>0.60</b> / 36.60 / 19.75 / 17.05 /                   | <b>0.34</b>        | 0.26 / 1.73 / 0.00    |  |  |  |                                |  |  |
|                     | LSUN(C)                                                       | 48.10 / 24.00 / 33.33 / 19.45 /                 | <b>13.05</b> / 28.00 / 16.10 / 16.10 /                  | <b>1.37</b>        | 4.33 / 2.12 / 0.36    |  |  |  |                                |  |  |
|                     | CIFAR-100                                                     | 63.50 / 54.05 / 69.37 / <b>50.20</b> /          | 70.68 / 54.00 / 62.00 / 62.00 /                         | <b>47.27</b>       | 48.20 / 30.02 / 25.91 |  |  |  |                                |  |  |
|                     | ImageNet(R)                                                   | 60.15 / 33.25 / 38.66 / 48.10 /                 | <b>1.76</b> / 55.55 / 25.85 / 22.70 /                   | <b>0.96</b>        | 0.56 / 7.14 / 0.08    |  |  |  |                                |  |  |
|                     | ImageNet(C)                                                   | 55.90 / 31.90 / 39.74 / 37.10 /                 | <b>4.38</b> / 45.80 / 25.75 / 25.85 /                   | <b>0.67</b>        | 1.69 / 5.47 / 0.28    |  |  |  |                                |  |  |
|                     | Gaussian                                                      | 99.95 / 21.05 / <b>0.00</b> / 88.60 /           | <b>0.00</b> / 78.15 / <b>0.00</b> / <b>0.00</b> /       | <b>0.00</b>        | 0.00 / 0.00 / 0.00    |  |  |  |                                |  |  |
|                     | Places365                                                     | 51.15 / 31.35 / 32.26 / 34.00 /                 | <b>13.14</b> / 44.65 / 18.45 / 18.45 /                  | <b>4.45</b>        | 3.52 / 1.91 / 0.32    |  |  |  |                                |  |  |
|                     | Textures                                                      | 55.00 / 38.80 / 20.09 / 43.75 /                 | <b>12.58</b> / 53.30 / 16.85 / 16.85 /                  | <b>5.50</b>        | 4.66 / 3.08 / 0.70    |  |  |  |                                |  |  |
|                     | iNaturalist                                                   | 55.80 / 41.70 / 38.75 / 44.30 /                 | <b>26.97</b> / 53.65 / 30.35 / 30.35 /                  | <b>6.11</b>        | 14.71 / 6.91 / 3.35   |  |  |  |                                |  |  |
|                     | SVHN                                                          | 60.65 / 27.85 / 15.02 / 36.55 /                 | <b>3.53</b> / 47.20 / 5.25 / 5.25 /                     | <b>0.78</b>        | 1.69 / 0.98 / 0.01    |  |  |  |                                |  |  |
| <b>average</b>      | 59.50 / 31.26 / 32.76 / 42.24 /                               | <b>13.43</b> / 49.02 / 21.93 / 21.16 /          | <b>6.16</b>                                             | 7.25 / 5.57 / 2.82 |                       |  |  |  |                                |  |  |
| CIFAR-10 (DenseNet) | iSUN                                                          | 38.00 / 6.25 / 16.72 / 10.20 /                  | <b>1.12</b> / 12.75 / 7.25 / 6.25 /                     | <b>0.20</b>        | 0.31 / 0.99 / 0.00    |  |  |  |                                |  |  |
|                     | LSUN(R)                                                       | 33.40 / 3.25 / 13.73 / 8.15 /                   | <b>0.40</b> / 10.35 / 4.90 / 3.75 /                     | <b>0.14</b>        | 0.26 / 1.09 / 0.02    |  |  |  |                                |  |  |
|                     | LSUN(C)                                                       | 48.30 / 25.95 / 52.52 / 27.20 /                 | <b>11.96</b> / 27.25 / 19.90 / 19.90 /                  | <b>1.33</b>        | 4.26 / 2.00 / 0.28    |  |  |  |                                |  |  |
|                     | CIFAR-100                                                     | 58.65 / 47.90 / 81.18 / <b>44.15</b> /          | 72.94 / <b>44.75</b> / 65.05 / 65.05 /                  | 47.98              | 55.98 / 29.90 / 38.19 |  |  |  |                                |  |  |
|                     | ImageNet(R)                                                   | 41.15 / 8.20 / 17.25 / 14.00 /                  | <b>1.27</b> / 18.15 / 7.75 / 6.40 /                     | <b>0.19</b>        | 0.51 / 2.86 / 0.03    |  |  |  |                                |  |  |
|                     | ImageNet(C)                                                   | 42.70 / 13.25 / 31.11 / 16.30 /                 | <b>3.03</b> / 19.40 / 13.65 / 12.55 /                   | <b>0.34</b>        | 1.33 / 3.62 / 0.32    |  |  |  |                                |  |  |
|                     | Gaussian                                                      | 11.55 / <b>0.00</b> / <b>0.00</b> / 0.30 /      | <b>0.00</b> / <b>0.00</b> / <b>0.00</b> / <b>0.00</b> / | <b>0.00</b>        | 0.00 / 0.09 / 0.00    |  |  |  |                                |  |  |
|                     | Places365                                                     | 53.30 / 32.15 / 54.60 / 32.05 /                 | <b>13.04</b> / 32.05 / 25.30 / 25.30 /                  | <b>5.62</b>        | 5.28 / 1.89 / 0.53    |  |  |  |                                |  |  |
|                     | Textures                                                      | 50.35 / 35.75 / 34.53 / 32.60 /                 | <b>11.76</b> / 29.50 / 21.80 / 21.80 /                  | <b>5.74</b>        | 6.30 / 3.16 / 0.94    |  |  |  |                                |  |  |
|                     | iNaturalist                                                   | 55.75 / 44.60 / 47.20 / 43.60 /                 | <b>26.87</b> / 40.75 / 33.90 / 32.85 /                  | <b>8.28</b>        | 17.86 / 8.32 / 5.01   |  |  |  |                                |  |  |
|                     | SVHN                                                          | 60.25 / 24.80 / 19.69 / 47.95 /                 | <b>4.66</b> / 33.65 / 9.55 / 5.45 /                     | <b>0.40</b>        | 2.02 / 6.03 / 0.25    |  |  |  |                                |  |  |
| <b>average</b>      | 44.85 / 22.01 / 33.50 / 25.14 /                               | <b>13.37</b> / 24.42 / 19.00 / 18.12 /          | <b>6.38</b>                                             | 8.56 / 5.45 / 4.14 |                       |  |  |  |                                |  |  |

Table 11: Performance comparison (in terms of AUROC) of various methods in CIFAR-10 (ID dataset) under three commonly-used networks. The best and second-best models without accessing external outlier datasets are coloured red and blue, respectively.

| OOD dataset         | w/o outlier OOD (AUROC $\uparrow$ )                                                 |                                                                                                                 |                       | w/ outlier OOD (AUROC $\uparrow$ ) |  |  |
|---------------------|-------------------------------------------------------------------------------------|-----------------------------------------------------------------------------------------------------------------|-----------------------|------------------------------------|--|--|
|                     | Msp/Odin/Mah/Energy/Gram/<br>Energy+ReAct/pNML/Odin+pNML/Ours                       |                                                                                                                 |                       | Oecc/Energy/<br>Oecc+pNML          |  |  |
| CIFAR-10 (ResNet34) | iSUN                                                                                | 90.74 / 93.65 / 96.93 / 92.60 / <b>99.84</b> / 92.71 / 96.37 / 97.53 / <b>99.84</b>                             | 99.92 / 98.78 / 99.94 |                                    |  |  |
|                     | LSUN(R)                                                                             | 91.51 / 94.52 / 97.19 / 93.15 / <b>99.90</b> / 93.25 / 96.83 / 97.98 / <b>99.82</b>                             | 99.94 / 98.92 / 99.95 |                                    |  |  |
|                     | LSUN(C)                                                                             | 91.98 / 93.80 / 94.38 / 94.00 / <b>97.73</b> / 93.99 / 95.41 / 95.57 / <b>99.56</b>                             | 99.08 / 98.55 / 99.48 |                                    |  |  |
|                     | CIFAR-100                                                                           | 87.01 / 87.32 / 88.34 / 87.11 / 79.80 / 87.14 / <b>89.63</b> / 88.98 / <b>91.05</b>                             | 87.24 / 93.30 / 94.19 |                                    |  |  |
|                     | ImageNet(R)                                                                         | 90.77 / 93.62 / 95.86 / 92.23 / <b>99.69</b> / 92.44 / 95.21 / 96.36 / <b>99.66</b>                             | 99.86 / 97.77 / 99.90 |                                    |  |  |
|                     | ImageNet(C)                                                                         | 91.27 / 93.15 / 95.44 / 92.79 / <b>99.40</b> / 92.92 / 95.29 / 96.04 / <b>99.74</b>                             | 99.71 / 98.09 / 99.85 |                                    |  |  |
|                     | Gaussian                                                                            | 97.48 / 99.99 / 99.97 / 98.22 / <b>100.0</b> / 98.21 / 99.98 / <b>100.0</b> / <b>100.0</b>                      | 100.0 / 99.32 / 100.0 |                                    |  |  |
|                     | Places365                                                                           | 91.08 / 92.64 / 93.86 / 92.75 / <b>97.68</b> / 92.90 / 95.09 / 95.09 / <b>98.96</b>                             | 98.98 / 98.56 / 99.53 |                                    |  |  |
|                     | Textures                                                                            | 89.04 / 90.05 / 94.12 / 90.42 / <b>97.55</b> / 90.54 / 94.43 / 94.43 / <b>98.86</b>                             | 99.17 / 98.39 / 99.59 |                                    |  |  |
|                     | iNaturalist                                                                         | 90.86 / 91.73 / 93.67 / 91.72 / <b>94.52</b> / 91.88 / 94.29 / 94.29 / <b>98.94</b>                             | 97.08 / 97.62 / 99.18 |                                    |  |  |
|                     | SVHN                                                                                | 89.89 / 95.92 / 94.11 / 91.28 / <b>99.43</b> / 91.21 / 94.85 / 97.96 / <b>99.92</b>                             | 99.74 / 98.93 / 99.85 |                                    |  |  |
| <b>average</b>      | 91.06 / 93.31 / 94.90 / 92.39 / <b>96.87</b> / 92.47 / 95.22 / 95.84 / <b>98.76</b> | 98.25 / 98.02 / 99.22                                                                                           |                       |                                    |  |  |
| CIFAR-10 (WRN)      | iSUN                                                                                | 91.56 / 95.43 / 93.69 / 92.58 / <b>99.74</b> / 91.29 / 96.36 / 96.61 / <b>99.91</b>                             | 99.91 / 99.37 / 99.99 |                                    |  |  |
|                     | LSUN(R)                                                                             | 92.02 / 95.94 / 94.28 / 94.42 / <b>99.85</b> / 93.26 / 96.53 / 96.98 / <b>99.88</b>                             | 99.92 / 99.38 / 99.99 |                                    |  |  |
|                     | LSUN(C)                                                                             | 92.25 / 94.98 / 94.25 / 95.65 / <b>96.92</b> / 93.80 / 96.78 / 96.78 / <b>99.62</b>                             | 98.80 / 99.37 / 99.79 |                                    |  |  |
|                     | CIFAR-100                                                                           | <b>87.34</b> / 84.78 / 82.81 / 87.32 / 76.14 / 86.36 / 83.52 / 83.52 / <b>91.08</b>                             | 82.18 / 93.01 / 89.19 |                                    |  |  |
|                     | ImageNet(R)                                                                         | 89.46 / 92.28 / 92.97 / 88.43 / <b>99.62</b> / 87.21 / 95.17 / 95.58 / <b>99.78</b>                             | 99.82 / 98.33 / 99.97 |                                    |  |  |
|                     | ImageNet(C)                                                                         | 90.81 / 92.79 / 93.09 / 91.76 / <b>99.08</b> / 90.08 / 94.95 / 95.00 / <b>99.80</b>                             | 99.48 / 98.59 / 99.88 |                                    |  |  |
|                     | Gaussian                                                                            | 81.48 / 96.39 / <b>100.0</b> / 81.86 / <b>100.0</b> / 92.37 / <b>100.0</b> / <b>100.0</b> / 99.99               | 100.0 / 99.74 / 100.0 |                                    |  |  |
|                     | Places365                                                                           | 90.32 / 92.76 / 94.16 / 92.05 / <b>97.08</b> / 88.30 / 96.40 / 96.40 / <b>99.01</b>                             | 98.96 / 99.43 / 99.78 |                                    |  |  |
|                     | Textures                                                                            | 89.55 / 90.59 / 96.49 / 88.76 / <b>97.20</b> / 85.63 / 96.74 / 96.74 / <b>98.71</b>                             | 98.74 / 99.14 / 99.68 |                                    |  |  |
|                     | iNaturalist                                                                         | 89.48 / 89.96 / 92.84 / 88.82 / <b>93.55</b> / 86.53 / 93.08 / 93.08 / <b>98.67</b>                             | 95.77 / 98.33 / 98.50 |                                    |  |  |
|                     | SVHN                                                                                | 89.52 / 94.21 / 97.15 / 91.27 / <b>99.29</b> / 87.75 / 98.86 / 98.86 / <b>99.86</b>                             | 99.58 / 99.61 / 99.97 |                                    |  |  |
| <b>average</b>      | 89.44 / 92.74 / 93.79 / 90.27 / <b>96.22</b> / 89.33 / 95.31 / 95.41 / <b>98.76</b> | 97.56 / 98.57 / 98.79                                                                                           |                       |                                    |  |  |
| CIFAR-10 (DenseNet) | iSUN                                                                                | 94.64 / 98.89 / 96.15 / 98.04 / <b>99.80</b> / 97.66 / 98.69 / 98.87 / <b>99.94</b>                             | 99.86 / 99.61 / 99.98 |                                    |  |  |
|                     | LSUN(R)                                                                             | 95.59 / 99.29 / 96.95 / 98.37 / <b>99.90</b> / 98.13 / 98.97 / 99.24 / <b>99.95</b>                             | 99.91 / 99.62 / 99.98 |                                    |  |  |
|                     | LSUN(C)                                                                             | 93.12 / 95.85 / 83.05 / 95.73 / <b>97.45</b> / 95.76 / 96.36 / 96.36 / <b>99.71</b>                             | 98.92 / 99.51 / 99.91 |                                    |  |  |
|                     | CIFAR-100                                                                           | 89.29 / 90.28 / 67.94 / <b>91.27</b> / 72.78 / <b>91.36</b> / 84.48 / 84.48 / 90.37                             | 77.44 / 94.04 / 84.35 |                                    |  |  |
|                     | ImageNet(R)                                                                         | 93.97 / 98.39 / 95.77 / 97.42 / <b>99.70</b> / 96.69 / 98.66 / 98.84 / <b>99.94</b>                             | 99.82 / 99.23 / 99.96 |                                    |  |  |
|                     | ImageNet(C)                                                                         | 93.81 / 97.60 / 91.78 / 97.10 / <b>99.34</b> / 96.58 / 97.56 / 97.69 / <b>99.90</b>                             | 99.49 / 99.16 / 99.79 |                                    |  |  |
|                     | Gaussian                                                                            | 97.64 / <b>100.0</b> / <b>100.0</b> / 98.84 / <b>100.0</b> / 99.74 / <b>100.0</b> / <b>100.0</b> / <b>100.0</b> | 99.99 / 97.50 / 100.0 |                                    |  |  |
|                     | Places365                                                                           | 91.91 / 94.57 / 82.80 / 94.48 / <b>97.32</b> / 94.58 / 95.23 / 95.23 / <b>98.90</b>                             | 98.65 / 99.47 / 99.80 |                                    |  |  |
|                     | Textures                                                                            | 91.42 / 92.89 / 90.77 / 93.15 / <b>97.46</b> / 94.40 / 96.03 / 96.03 / <b>98.90</b>                             | 98.41 / 99.27 / 99.69 |                                    |  |  |
|                     | iNaturalist                                                                         | 91.16 / 92.32 / 86.38 / 92.47 / <b>93.75</b> / 92.77 / 93.34 / 93.55 / <b>98.47</b>                             | 95.32 / 98.34 / 98.43 |                                    |  |  |
|                     | SVHN                                                                                | 89.90 / 94.13 / 95.40 / 91.01 / <b>98.94</b> / 94.73 / 98.33 / 98.63 / <b>99.93</b>                             | 99.46 / 98.77 / 99.92 |                                    |  |  |
| <b>average</b>      | 92.95 / 95.84 / 89.73 / 95.26 / 96.04 / 95.67 / 96.15 / <b>96.27</b> / <b>98.73</b> | 97.02 / 98.59 / 98.35                                                                                           |                       |                                    |  |  |

Table 12: Performance comparison (in terms of AUPR) of various methods in CIFAR-10 (ID dataset) under three commonly-used networks. The best and second-best models without accessing external outlier datasets are coloured red and blue, respectively.

| OOD dataset         | w/o outlier OOD (AUPR $\uparrow$ )                                                  |                                                                                                                 |                       |  |  |  |  | w/ outlier OOD (AUPR $\uparrow$ ) |  |  |
|---------------------|-------------------------------------------------------------------------------------|-----------------------------------------------------------------------------------------------------------------|-----------------------|--|--|--|--|-----------------------------------|--|--|
|                     | Msp/Odin/Mah/Energy/Gram/<br>Energy+ReAct/pNML/Odin+pNML/Ours                       |                                                                                                                 |                       |  |  |  |  | Oecc/Energy/<br>Oecc+pNML         |  |  |
| CIFAR-10 (ResNet34) | iSUN                                                                                | 98.01 / 98.54 / 99.37 / 98.32 / <b>99.96</b> / 98.35 / 99.26 / 99.48 / <b>99.97</b>                             | 99.98 / 99.76 / 99.99 |  |  |  |  |                                   |  |  |
|                     | LSUN(R)                                                                             | 98.21 / 98.75 / 99.43 / 98.45 / <b>99.98</b> / 98.47 / 99.37 / 99.58 / <b>99.96</b>                             | 99.99 / 99.79 / 99.99 |  |  |  |  |                                   |  |  |
|                     | LSUN(C)                                                                             | 98.32 / 98.64 / 98.87 / 98.69 / <b>99.41</b> / 98.68 / 99.07 / 99.02 / <b>99.91</b>                             | 99.79 / 99.69 / 99.89 |  |  |  |  |                                   |  |  |
|                     | CIFAR-100                                                                           | 96.96 / 96.87 / 97.29 / 96.79 / 93.87 / 96.81 / <b>97.65</b> / 97.42 / <b>97.86</b>                             | 96.05 / 97.97 / 98.15 |  |  |  |  |                                   |  |  |
|                     | ImageNet(R)                                                                         | 98.03 / 98.55 / 99.14 / 98.24 / <b>99.92</b> / 98.30 / 99.01 / 99.22 / <b>99.92</b>                             | 99.97 / 99.47 / 99.98 |  |  |  |  |                                   |  |  |
|                     | ImageNet(C)                                                                         | 98.17 / 98.47 / 99.07 / 98.38 / <b>99.85</b> / 98.41 / 99.05 / 99.16 / <b>99.95</b>                             | 99.94 / 99.57 / 99.97 |  |  |  |  |                                   |  |  |
|                     | Gaussian                                                                            | 99.54 / <b>100.0</b> / 99.99 / 99.69 / <b>100.0</b> / 99.68 / <b>100.0</b> / <b>100.0</b> / <b>100.0</b>        | 100.0 / 99.88 / 100.0 |  |  |  |  |                                   |  |  |
|                     | Places365                                                                           | 98.08 / 98.33 / 98.75 / 98.37 / <b>99.40</b> / 98.42 / 98.98 / 98.98 / <b>99.78</b>                             | 99.77 / 99.71 / 99.90 |  |  |  |  |                                   |  |  |
|                     | Textures                                                                            | 97.58 / 97.67 / 98.82 / 97.73 / <b>99.36</b> / 97.78 / 98.86 / 98.86 / <b>99.76</b>                             | 99.81 / 99.64 / 99.91 |  |  |  |  |                                   |  |  |
|                     | iNaturalist                                                                         | 98.04 / 98.13 / 98.72 / 98.04 / 98.56 / 98.10 / <b>98.83</b> / <b>98.83</b> / <b>99.79</b>                      | 99.27 / 99.45 / 99.82 |  |  |  |  |                                   |  |  |
|                     | SVHN                                                                                | 97.96 / 99.13 / 98.83 / 98.17 / <b>99.86</b> / 98.16 / 98.99 / 99.54 / <b>99.98</b>                             | 99.94 / 99.79 / 99.97 |  |  |  |  |                                   |  |  |
| <b>average</b>      | 98.08 / 98.46 / 98.93 / 98.26 / <b>99.11</b> / 98.29 / 99.01 / 99.10 / <b>99.72</b> | 99.50 / 99.52 / 99.78                                                                                           |                       |  |  |  |  |                                   |  |  |
| CIFAR-10 (WRN)      | iSUN                                                                                | 98.24 / 98.95 / 98.65 / 98.28 / <b>99.94</b> / 98.04 / 99.22 / 99.26 / <b>99.98</b>                             | 99.98 / 99.87 / 100.0 |  |  |  |  |                                   |  |  |
|                     | LSUN(R)                                                                             | 98.31 / 99.05 / 98.82 / 98.76 / <b>99.96</b> / 98.55 / 99.26 / 99.36 / <b>99.98</b>                             | 99.98 / 99.88 / 100.0 |  |  |  |  |                                   |  |  |
|                     | LSUN(C)                                                                             | 98.26 / 98.72 / 98.75 / 98.90 / 99.18 / 98.50 / <b>99.27</b> / <b>99.27</b> / <b>99.92</b>                      | 99.68 / 99.87 / 99.92 |  |  |  |  |                                   |  |  |
|                     | CIFAR-100                                                                           | <b>96.86</b> / 95.50 / 95.85 / 96.62 / 92.88 / 96.50 / 95.78 / 95.78 / <b>97.96</b>                             | 94.38 / 98.14 / 96.19 |  |  |  |  |                                   |  |  |
|                     | ImageNet(R)                                                                         | 97.70 / 98.09 / 98.47 / 96.99 / <b>99.90</b> / 96.87 / 98.94 / 99.02 / <b>99.95</b>                             | 99.95 / 99.63 / 99.99 |  |  |  |  |                                   |  |  |
|                     | ImageNet(C)                                                                         | 98.03 / 98.29 / 98.50 / 98.05 / <b>99.77</b> / 97.69 / 98.86 / 98.86 / <b>99.96</b>                             | 99.86 / 99.68 / 99.96 |  |  |  |  |                                   |  |  |
|                     | Gaussian                                                                            | 96.49 / 99.33 / <b>100.0</b> / 96.02 / <b>100.0</b> / 98.61 / <b>100.0</b> / <b>100.0</b> / <b>100.0</b>        | 100.0 / 99.96 / 100.0 |  |  |  |  |                                   |  |  |
|                     | Places365                                                                           | 97.73 / 98.14 / 98.71 / 98.05 / <b>99.26</b> / 96.91 / 99.17 / 99.17 / <b>99.78</b>                             | 99.72 / 99.88 / 99.92 |  |  |  |  |                                   |  |  |
|                     | Textures                                                                            | 97.46 / 97.38 / 99.25 / 97.01 / <b>99.27</b> / 96.22 / 99.26 / 99.26 / <b>99.69</b>                             | 99.64 / 99.80 / 99.88 |  |  |  |  |                                   |  |  |
|                     | iNaturalist                                                                         | 97.47 / 97.34 / <b>98.43</b> / 97.04 / 98.30 / 96.60 / 98.32 / 98.32 / <b>99.71</b>                             | 98.71 / 99.60 / 99.43 |  |  |  |  |                                   |  |  |
|                     | SVHN                                                                                | 97.57 / 98.70 / 99.37 / 97.84 / <b>99.82</b> / 97.07 / 99.75 / 99.75 / <b>99.97</b>                             | 99.90 / 99.92 / 99.99 |  |  |  |  |                                   |  |  |
| <b>average</b>      | 97.65 / 98.14 / 98.62 / 97.60 / <b>98.93</b> / 97.41 / 98.89 / 98.91 / <b>99.72</b> | 99.25 / 99.66 / 99.57                                                                                           |                       |  |  |  |  |                                   |  |  |
| CIFAR-10 (DenseNet) | iSUN                                                                                | 98.94 / 99.77 / 99.06 / 99.61 / <b>99.95</b> / 99.53 / 99.72 / 99.76 / <b>99.99</b>                             | 99.97 / 99.92 / 100.0 |  |  |  |  |                                   |  |  |
|                     | LSUN(R)                                                                             | 99.14 / 99.86 / 99.29 / 99.68 / <b>99.98</b> / 99.63 / 99.78 / 99.84 / <b>99.99</b>                             | 99.98 / 99.93 / 100.0 |  |  |  |  |                                   |  |  |
|                     | LSUN(C)                                                                             | 98.63 / 99.13 / 95.36 / 99.13 / <b>99.33</b> / 99.14 / 99.21 / 99.21 / <b>99.94</b>                             | 99.73 / 99.90 / 99.98 |  |  |  |  |                                   |  |  |
|                     | CIFAR-100                                                                           | 97.61 / 97.70 / 90.81 / <b>98.00</b> / 91.65 / <b>98.02</b> / 96.22 / 96.22 / 97.72                             | 92.84 / 98.60 / 94.66 |  |  |  |  |                                   |  |  |
|                     | ImageNet(R)                                                                         | 98.78 / 99.65 / 98.94 / 99.47 / <b>99.92</b> / 99.30 / 99.72 / 99.75 / <b>99.99</b>                             | 99.96 / 99.85 / 99.99 |  |  |  |  |                                   |  |  |
|                     | ImageNet(C)                                                                         | 98.77 / 99.50 / 97.87 / 99.41 / <b>99.84</b> / 99.30 / 99.48 / 99.50 / <b>99.98</b>                             | 99.85 / 99.83 / 99.93 |  |  |  |  |                                   |  |  |
|                     | Gaussian                                                                            | 99.56 / <b>100.0</b> / <b>100.0</b> / 99.79 / <b>100.0</b> / 99.95 / <b>100.0</b> / <b>100.0</b> / <b>100.0</b> | 100.0 / 99.57 / 100.0 |  |  |  |  |                                   |  |  |
|                     | Places365                                                                           | 98.35 / 98.87 / 95.31 / 98.86 / <b>99.31</b> / 98.87 / 98.97 / 98.97 / <b>99.77</b>                             | 99.65 / 99.89 / 99.94 |  |  |  |  |                                   |  |  |
|                     | Textures                                                                            | 98.16 / 98.23 / 97.62 / 98.30 / <b>99.34</b> / 98.77 / 99.15 / 99.15 / <b>99.76</b>                             | 99.57 / 99.85 / 99.90 |  |  |  |  |                                   |  |  |
|                     | iNaturalist                                                                         | 98.17 / 98.37 / 96.44 / 98.38 / 98.34 / 98.42 / 98.52 / <b>98.57</b> / <b>99.68</b>                             | 98.68 / 99.65 / 99.49 |  |  |  |  |                                   |  |  |
|                     | SVHN                                                                                | 97.90 / 98.63 / 98.88 / 98.04 / 99.71 / 98.93 / 99.67 / <b>99.73</b> / <b>99.98</b>                             | 99.86 / 99.75 / 99.98 |  |  |  |  |                                   |  |  |
| <b>average</b>      | 98.55 / 99.06 / 97.23 / 98.97 / 98.85 / 99.08 / 99.13 / <b>99.15</b> / <b>99.71</b> | 99.10 / 99.70 / 99.44                                                                                           |                       |  |  |  |  |                                   |  |  |

## A.7 FPR95%, AUROC and AUPR for ImageNet experiment

Table 13: Performance comparison of various methods in ImageNet (ID dataset). The best and second-best models are coloured red and blue, respectively.

|                       | OOD dataset    | Msp         | Odin         | Mah   | Energy       | Gram         | Energy +ReAct | pNML         | Odin +pNML   | Ours         |
|-----------------------|----------------|-------------|--------------|-------|--------------|--------------|---------------|--------------|--------------|--------------|
| ImageNet(MobileNetV2) | iSUN           | 42.41       | <b>0.83</b>  | 97.71 | 30.79        | 16.69        | 8.92          | 56.67        | 8.77         | <b>0.26</b>  |
|                       | LSUN(R)        | 42.02       | <b>0.46</b>  | 98.26 | 33.12        | 18.42        | 10.82         | 59.90        | 7.46         | <b>0.40</b>  |
|                       | LSUN(C)        | 26.11       | <b>0.03</b>  | 99.55 | 11.38        | 11.07        | 5.76          | 15.33        | 4.09         | <b>0.00</b>  |
|                       | CIFAR-10       | 64.21       | <b>3.49</b>  | 93.88 | 65.83        | 4.00         | 47.21         | 58.51        | 4.23         | <b>2.23</b>  |
|                       | CIFAR-100      | 58.98       | 4.71         | 88.60 | 55.30        | 11.43        | 38.33         | 39.90        | <b>4.20</b>  | <b>3.07</b>  |
|                       | Gaussian       | <b>0.00</b> | <b>0.00</b>  | 99.98 | <b>0.00</b>  | <b>0.00</b>  | <b>0.00</b>   | <b>0.00</b>  | <b>0.00</b>  | <b>0.00</b>  |
|                       | Places365      | 76.85       | <b>60.10</b> | 99.28 | 66.27        | 83.26        | 60.76         | 93.42        | 93.42        | <b>60.07</b> |
|                       | Textures       | 70.90       | 49.95        | 68.00 | 54.50        | 45.22        | 40.50         | <b>14.63</b> | <b>14.63</b> | 18.33        |
|                       | iNaturalist    | 59.82       | 56.53        | 99.37 | 55.32        | 70.55        | <b>44.73</b>  | 83.58        | 83.58        | <b>49.07</b> |
|                       | SVHN           | 8.49        | <b>0.04</b>  | 98.48 | 2.90         | 0.66         | 1.54          | 0.08         | 0.08         | <b>0.00</b>  |
|                       | <b>average</b> | 44.98       | <b>17.61</b> | 94.31 | 37.54        | 26.13        | 25.86         | 42.20        | 22.05        | <b>13.34</b> |
| ImageNet(MobileNetV2) | iSUN           | 91.92       | <b>99.83</b> | 66.60 | 95.32        | 95.96        | 98.36         | 92.03        | 98.20        | <b>99.64</b> |
|                       | LSUN(R)        | 92.00       | <b>99.87</b> | 68.24 | 95.01        | 95.46        | 98.08         | 91.58        | 98.38        | <b>99.56</b> |
|                       | LSUN(C)        | 95.03       | <b>99.96</b> | 27.61 | 98.01        | 97.28        | 98.96         | 97.53        | 98.97        | <b>99.95</b> |
|                       | CIFAR-10       | 83.56       | <b>99.22</b> | 70.51 | 86.36        | 98.94        | 90.60         | 91.36        | 98.97        | <b>99.45</b> |
|                       | CIFAR-100      | 86.14       | <b>99.06</b> | 66.80 | 88.72        | 97.33        | 92.51         | 94.21        | 98.99        | <b>99.34</b> |
|                       | Gaussian       | 99.73       | 99.99        | 73.59 | 99.97        | <b>100.0</b> | 99.98         | <b>100.0</b> | <b>100.0</b> | 99.98        |
|                       | Places365      | 78.14       | <b>84.81</b> | 25.84 | 83.21        | 61.15        | 84.32         | 57.10        | 57.10        | <b>86.55</b> |
|                       | Textures       | 78.95       | 85.79        | 74.06 | 86.59        | 85.18        | 91.03         | <b>96.93</b> | <b>96.93</b> | 96.01        |
|                       | iNaturalist    | 86.72       | 88.36        | 28.85 | 90.34        | 72.39        | <b>92.55</b>  | 66.73        | 66.73        | <b>91.48</b> |
|                       | SVHN           | 98.41       | <b>99.99</b> | 33.12 | 99.35        | 99.79        | 99.68         | 99.72        | 99.72        | <b>99.99</b> |
|                       | <b>average</b> | 89.06       | <b>95.69</b> | 53.52 | 92.29        | 90.35        | 94.61         | 88.72        | 91.40        | <b>97.20</b> |
| ImageNet(MobileNetV2) | iSUN           | 98.43       | <b>99.97</b> | 92.75 | 99.18        | 98.99        | 99.70         | 98.59        | 99.68        | <b>99.94</b> |
|                       | LSUN(R)        | 98.28       | <b>99.97</b> | 92.54 | 99.02        | 98.72        | 99.61         | 98.36        | 99.68        | <b>99.92</b> |
|                       | LSUN(C)        | 98.90       | <b>99.99</b> | 73.37 | 99.60        | 99.23        | 99.79         | 99.52        | 99.80        | <b>99.99</b> |
|                       | CIFAR-10       | 96.05       | <b>99.84</b> | 92.36 | 96.98        | 99.74        | 97.91         | 98.29        | 99.79        | <b>99.89</b> |
|                       | CIFAR-100      | 96.78       | <b>99.80</b> | 90.03 | 97.48        | 99.27        | 98.33         | 98.87        | 99.79        | <b>99.86</b> |
|                       | Gaussian       | 99.95       | <b>100.0</b> | 94.63 | <b>100.0</b> | <b>100.0</b> | <b>100.0</b>  | <b>100.0</b> | <b>100.0</b> | <b>100.0</b> |
|                       | Places365      | 94.39       | <b>96.12</b> | 71.86 | 95.80        | 87.66        | 96.04         | 87.36        | 87.36        | <b>96.77</b> |
|                       | Textures       | 96.67       | 97.66        | 95.06 | 97.86        | 97.26        | 98.72         | <b>99.60</b> | <b>99.60</b> | 99.45        |
|                       | iNaturalist    | 96.96       | 97.35        | 73.90 | 97.96        | 91.17        | <b>98.43</b>  | 90.15        | 90.15        | <b>98.22</b> |
|                       | SVHN           | 99.18       | <b>99.99</b> | 75.78 | 99.87        | 99.86        | 99.93         | 99.88        | 99.88        | <b>100.0</b> |
|                       | <b>average</b> | 97.56       | <b>99.07</b> | 85.23 | 98.38        | 97.19        | 98.85         | 97.06        | 97.57        | <b>99.40</b> |

## A.8 Detailed results for ablation studies

Table 14 shows the performances of the proposed method under more hyperparameter choices, and some detailed results are provided in Table 15. Table 16 shows the detailed results across different OOD datasets to verify the effectiveness of the proposed two regularization terms.

Table 14: Ablation studies on CIFAR-100 (ID dataset) with WideResNet demonstrating the proposed method’s robustness to hyperparameters. The result is the average value across all OOD datasets.

| ablation studies               | parameters | mean AUROC ( $\uparrow$ ) | mean AUPR ( $\uparrow$ ) | mean FPR95% ( $\downarrow$ ) |
|--------------------------------|------------|---------------------------|--------------------------|------------------------------|
| batch size                     | 128        | 96.14                     | 98.94                    | 13.43                        |
|                                | 192        | 96.08                     | 98.93                    | 13.63                        |
|                                | 256        | 96.09                     | 98.94                    | 13.35                        |
|                                | 384        | 96.07                     | 98.95                    | 13.61                        |
|                                | 512        | 96.08                     | 98.93                    | 13.63                        |
| regularization weight $\gamma$ | 0.005      | 96.02                     | 98.94                    | 14.08                        |
|                                | 0.075      | 96.16                     | 98.95                    | 13.29                        |
|                                | 0.01       | 96.09                     | 98.94                    | 13.35                        |
|                                | 0.015      | 96.12                     | 98.92                    | 13.08                        |
|                                | 0.02       | 96.15                     | 98.91                    | 12.92                        |
| constant $r$                   | 5          | 96.02                     | 98.94                    | 14.03                        |
|                                | 7.5        | 96.08                     | 98.95                    | 13.62                        |
|                                | 10         | 96.09                     | 98.94                    | 13.35                        |
|                                | 15         | 96.12                     | 98.92                    | 13.08                        |
|                                | 20         | 96.12                     | 98.91                    | 12.87                        |

Table 15: Robustness of the proposed model to hyperparameters evaluated on CIFAR-100 experiment using WideResNet. DCR: density consistency regularization. CDR: contrastive distribution regularization. RW: regularization weight.

| batch size        | FPR95%     |            |            | AUROC      |            |            | AUPR       |            |            |
|-------------------|------------|------------|------------|------------|------------|------------|------------|------------|------------|
|                   | 128        | 256        | 512        | 128        | 256        | 512        | 128        | 256        | 512        |
| iSUN              | 1.81±0.31  | 2.34±0.32  | 2.74±0.40  | 99.52±0.06 | 99.41±0.05 | 99.35±0.07 | 99.90±0.01 | 99.87±0.01 | 99.86±0.02 |
| LSUN(R)           | 0.87±0.18  | 1.08±0.21  | 1.24±0.20  | 99.72±0.03 | 99.68±0.03 | 99.66±0.03 | 99.94±0.01 | 99.93±0.01 | 99.93±0.22 |
| LSUN(C)           | 5.38±0.27  | 5.67±0.40  | 5.75±0.30  | 98.81±0.05 | 98.78±0.05 | 98.78±0.05 | 99.75±0.01 | 99.74±0.01 | 99.74±0.01 |
| CIFAR-10          | 89.52±0.60 | 88.49±0.62 | 88.56±0.50 | 69.79±0.50 | 69.68±0.55 | 69.88±0.53 | 90.97±0.20 | 91.10±0.21 | 91.09±0.01 |
| ImageNet(R)       | 2.50±0.20  | 3.34±0.24  | 3.73±0.35  | 99.30±0.04 | 99.11±0.06 | 99.02±0.07 | 99.84±0.01 | 99.80±0.02 | 99.77±0.02 |
| ImageNet(C)       | 2.54±0.23  | 3.48±0.32  | 3.74±0.28  | 99.29±0.06 | 99.10±0.06 | 99.07±0.06 | 99.84±0.02 | 99.80±0.02 | 99.79±0.02 |
| Gaussian          | 0.00±0.00  | 0.00±0.00  | 0.00±0.00  | 99.96±0.00 | 99.96±0.00 | 99.95±0.00 | 99.99±0.00 | 99.99±0.00 | 99.99±0.00 |
| Places365         | 11.72±0.66 | 11.27±0.61 | 11.58±0.72 | 97.60±0.12 | 97.65±0.10 | 97.69±0.11 | 99.47±0.03 | 99.49±0.03 | 99.50±0.03 |
| Textures          | 12.78±0.72 | 12.40±0.70 | 12.93±0.49 | 97.31±0.11 | 97.24±0.11 | 97.13±0.11 | 99.39±0.03 | 99.37±0.03 | 99.34±0.03 |
| iNaturalist       | 19.08±0.69 | 17.10±0.57 | 18.14±0.62 | 96.59±0.08 | 96.78±0.09 | 96.71±0.09 | 99.28±0.02 | 99.32±0.02 | 99.31±0.02 |
| SVHN              | 1.53±0.25  | 1.68±0.31  | 1.56±0.22  | 99.70±0.04 | 99.63±0.05 | 99.66±0.05 | 99.93±0.01 | 99.91±0.01 | 99.92±0.01 |
| average           | 13.43      | 13.35      | 13.63      | 96.14      | 96.09      | 96.08      | 98.94      | 98.94      | 98.93      |
| <b>RW</b>         | 0.005      | 0.01       | 0.02       | 0.005      | 0.01       | 0.02       | 0.005      | 0.01       | 0.02       |
| iSUN              | 2.86±0.27  | 2.34±0.32  | 1.38±0.24  | 99.36±0.05 | 99.41±0.05 | 99.58±0.05 | 99.86±0.01 | 99.87±0.01 | 99.91±0.01 |
| LSUN(R)           | 1.33±0.23  | 1.08±0.21  | 0.70±0.16  | 99.67±0.04 | 99.68±0.03 | 99.76±0.03 | 99.93±0.01 | 99.93±0.01 | 99.95±0.01 |
| LSUN(C)           | 6.84±0.38  | 5.67±0.40  | 4.88±0.27  | 98.68±0.05 | 98.78±0.05 | 98.88±0.05 | 99.73±0.01 | 99.74±0.01 | 99.76±0.01 |
| CIFAR-10          | 89.38±0.37 | 88.49±0.62 | 88.08±0.50 | 69.20±0.54 | 69.68±0.55 | 69.35±0.59 | 91.11±0.20 | 91.10±0.21 | 90.59±0.24 |
| ImageNet(R)       | 3.58±0.26  | 3.34±0.24  | 1.88±0.20  | 99.20±0.06 | 99.11±0.06 | 99.42±0.05 | 99.82±0.02 | 99.80±0.02 | 99.87±0.02 |
| ImageNet(C)       | 4.09±0.29  | 3.48±0.32  | 2.28±0.21  | 99.14±0.03 | 99.10±0.06 | 99.40±0.03 | 99.82±0.01 | 99.80±0.02 | 99.87±0.01 |
| Gaussian          | 0.00±0.00  | 0.00±0.00  | 0.00±0.00  | 100.0±0.00 | 99.96±0.00 | 99.92±0.00 | 100.0±0.00 | 99.99±0.00 | 99.99±0.00 |
| Places365         | 13.86±0.63 | 11.27±0.61 | 10.40±0.56 | 97.42±0.07 | 97.65±0.10 | 97.75±0.10 | 99.45±0.02 | 99.49±0.03 | 99.50±0.03 |
| Textures          | 13.42±0.67 | 12.40±0.70 | 12.08±0.53 | 97.12±0.07 | 97.24±0.11 | 97.38±0.11 | 99.34±0.02 | 99.37±0.03 | 99.40±0.03 |
| iNaturalist       | 17.14±0.56 | 17.10±0.57 | 19.10±0.65 | 96.94±0.08 | 96.78±0.09 | 96.47±0.09 | 99.37±0.02 | 99.32±0.02 | 99.25±0.02 |
| SVHN              | 2.34±0.21  | 1.68±0.31  | 1.33±0.22  | 99.50±0.06 | 99.63±0.05 | 99.71±0.04 | 99.88±0.02 | 99.91±0.01 | 99.93±0.01 |
| average           | 14.08      | 13.35      | 12.92      | 96.02      | 96.09      | 96.15      | 98.94      | 98.94      | 98.91      |
| <b>constant r</b> | 0.005      | 0.01       | 0.02       | 0.005      | 0.01       | 0.02       | 0.005      | 0.01       | 0.02       |
| iSUN              | 2.84±0.28  | 2.34±0.32  | 1.48±0.21  | 99.36±0.05 | 99.41±0.05 | 99.56±0.05 | 99.86±0.01 | 99.87±0.01 | 99.91±0.01 |
| LSUN(R)           | 1.34±0.21  | 1.08±0.21  | 0.68±0.15  | 99.66±0.04 | 99.68±0.03 | 99.77±0.03 | 99.93±0.01 | 99.93±0.01 | 99.95±0.01 |
| LSUN(C)           | 6.78±0.39  | 5.67±0.40  | 4.98±0.40  | 98.68±0.05 | 98.78±0.05 | 98.85±0.06 | 99.73±0.01 | 99.74±0.01 | 99.75±0.02 |
| CIFAR-10          | 89.38±0.40 | 88.49±0.62 | 88.17±0.52 | 69.21±0.54 | 69.68±0.55 | 69.32±0.57 | 91.13±0.20 | 91.10±0.21 | 90.63±0.23 |
| ImageNet(R)       | 3.53±0.27  | 3.34±0.24  | 2.26±0.25  | 99.20±0.06 | 99.11±0.06 | 99.36±0.06 | 99.83±0.02 | 99.80±0.02 | 99.85±0.02 |
| ImageNet(C)       | 4.06±0.25  | 3.48±0.32  | 2.48±0.25  | 99.14±0.03 | 99.10±0.06 | 99.26±0.05 | 99.82±0.01 | 99.80±0.02 | 99.83±0.02 |
| Gaussian          | 0.00±0.00  | 0.00±0.00  | 0.00±0.00  | 100.0±0.00 | 99.96±0.00 | 99.92±0.00 | 100.0±0.00 | 99.99±0.00 | 99.99±0.00 |
| Places365         | 13.80±0.62 | 11.27±0.61 | 10.29±0.64 | 97.42±0.07 | 97.65±0.10 | 97.70±0.10 | 99.45±0.02 | 99.49±0.03 | 99.49±0.03 |
| Textures          | 13.29±0.68 | 12.40±0.70 | 11.80±0.60 | 97.12±0.07 | 97.24±0.11 | 97.35±0.14 | 99.34±0.02 | 99.37±0.03 | 99.39±0.04 |
| iNaturalist       | 17.00±0.56 | 17.10±0.57 | 18.12±0.66 | 96.94±0.08 | 96.78±0.09 | 96.56±0.09 | 99.37±0.02 | 99.32±0.02 | 99.26±0.02 |
| SVHN              | 2.34±0.22  | 1.68±0.31  | 1.30±0.22  | 99.50±0.06 | 99.63±0.05 | 99.70±0.04 | 99.88±0.02 | 99.91±0.01 | 99.93±0.01 |
| average           | 14.03      | 13.35      | 12.87      | 96.02      | 96.09      | 96.12      | 98.94      | 98.94      | 98.91      |

Table 16: Contribution of the proposed regularization terms to OOD detection performance evaluated on CIFAR-100 experiment using WideResNet. DCR: density consistency regularization. CDR: contrastive distribution regularization.

|             | FPR95%     |            |            | AUROC      |            |            | AUPR       |            |            |
|-------------|------------|------------|------------|------------|------------|------------|------------|------------|------------|
| DCR         | -          | -          | ✓          | -          | -          | ✓          | -          | -          | ✓          |
| CDR         | -          | ✓          | ✓          | -          | ✓          | ✓          | -          | ✓          | ✓          |
| iSUN        | 80.69±1.01 | 50.56±0.80 | 2.34±0.32  | 79.19±0.19 | 89.94±0.18 | 99.41±0.05 | 94.98±0.08 | 97.79±0.05 | 99.87±0.01 |
| LSUN(R)     | 78.87±0.73 | 47.46±0.43 | 1.08±0.21  | 79.18±0.28 | 90.85±0.20 | 99.68±0.03 | 94.95±0.10 | 98.02±0.05 | 99.93±0.01 |
| LSUN(C)     | 72.50±0.88 | 24.96±0.66 | 5.67±0.40  | 83.32±0.33 | 95.19±0.10 | 98.78±0.05 | 96.11±0.09 | 98.95±0.02 | 99.74±0.01 |
| CIFAR-10    | 79.79±1.46 | 82.74±1.12 | 88.49±0.62 | 77.25±0.51 | 73.73±0.49 | 69.68±0.55 | 94.26±0.16 | 93.08±0.16 | 91.10±0.21 |
| ImageNet(R) | 79.36±0.59 | 51.81±0.94 | 3.34±0.24  | 77.64±0.38 | 88.34±0.36 | 99.11±0.06 | 94.32±0.16 | 97.34±0.11 | 99.80±0.02 |
| ImageNet(C) | 72.65±0.74 | 45.15±1.11 | 3.48±0.32  | 81.20±0.34 | 90.64±0.32 | 99.10±0.06 | 95.35±0.12 | 97.92±0.09 | 99.80±0.02 |
| Gaussian    | 66.77±0.96 | 0.02±0.03  | 0.00±0.00  | 91.42±0.11 | 99.96±0.01 | 99.96±0.00 | 98.36±0.02 | 99.99±0.00 | 99.99±0.00 |
| Places365   | 81.08±0.98 | 39.18±1.03 | 11.27±0.61 | 76.92±0.55 | 92.28±0.23 | 97.65±0.10 | 94.26±0.15 | 98.30±0.06 | 99.49±0.03 |
| Textures    | 78.60±0.88 | 37.33±1.02 | 12.40±0.70 | 77.73±0.43 | 92.41±0.25 | 97.24±0.11 | 94.23±0.13 | 98.31±0.06 | 99.37±0.03 |
| iNaturalist | 71.80±0.84 | 43.39±0.86 | 17.10±0.57 | 82.93±0.40 | 91.76±0.19 | 96.78±0.09 | 95.86±0.15 | 98.20±0.06 | 99.32±0.02 |
| SVHN        | 85.33±0.63 | 34.94±0.86 | 1.68±0.31  | 73.82±0.36 | 94.18±0.17 | 99.63±0.05 | 93.56±0.10 | 98.77±0.05 | 99.91±0.01 |
| average     | 77.04      | 41.59      | 13.35      | 80.05      | 90.84      | 96.09      | 95.11      | 97.88      | 98.94      |

## A.9 Overlapping object between ID and OOD datasets in ImageNet experiment

In the ImageNet experiment, we observed that there are numerous semantically overlapping objects (SOO) between ImageNet (ID dataset) and iNaturalist, Places365 or Textures, although we have used the conceptually disjoint subsets of Places365 and iNaturalist provided by previous study [3] for model evaluation, in which researchers had removed images whose category conceptually related to ImageNet dataset from iNaturalist and Places365. However, categorical label irrelevance does not imply object discrepancy or distribution separability. For example, in the Places365 dataset, images of the field wild category contain lions, dragonflies, snow leopards and other objects that appear in the ImageNet dataset. The forest road and underwater (ocean deep) images in Places365 include trolleybus and turtles seen in ImageNet. In the Textures dataset, images of bubbly, cobwebbed, frilly, etc., contain objects such as bubbles, spider webs, head cabbages, etc., annotated in ImageNet. The iNaturalist dataset also includes many labeled objects in ImageNet, such as lycaenid butterflies, sulfur butterflies, daisies, bees, etc. Fig.1, 2, and 3 show a few typical examples. Such a large number of overlapping objects appears to be the reason why our method performs relatively poorly on Places365, Textures and iNaturalist datasets in the ImageNet experiment.

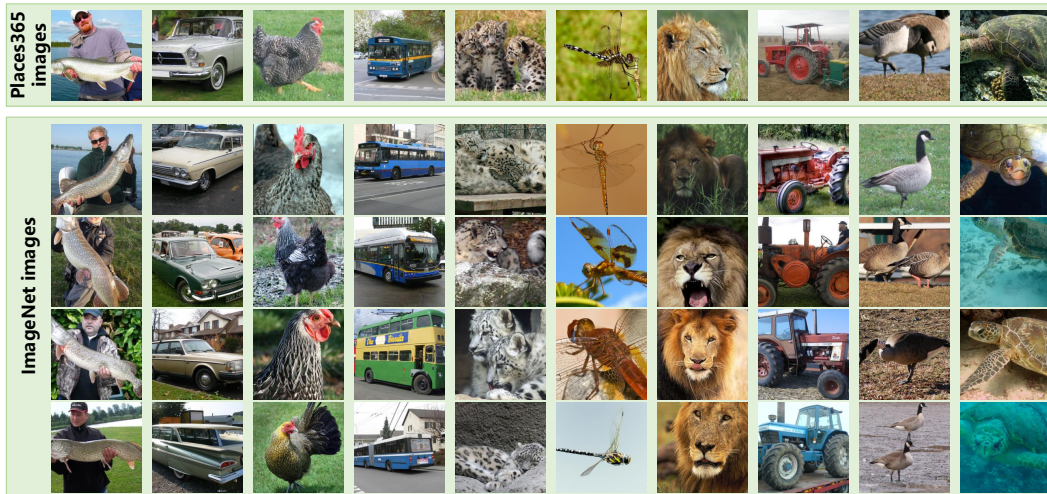

Figure 1: Examples of semantically overlapping objects between ImageNet and Places365 datasets

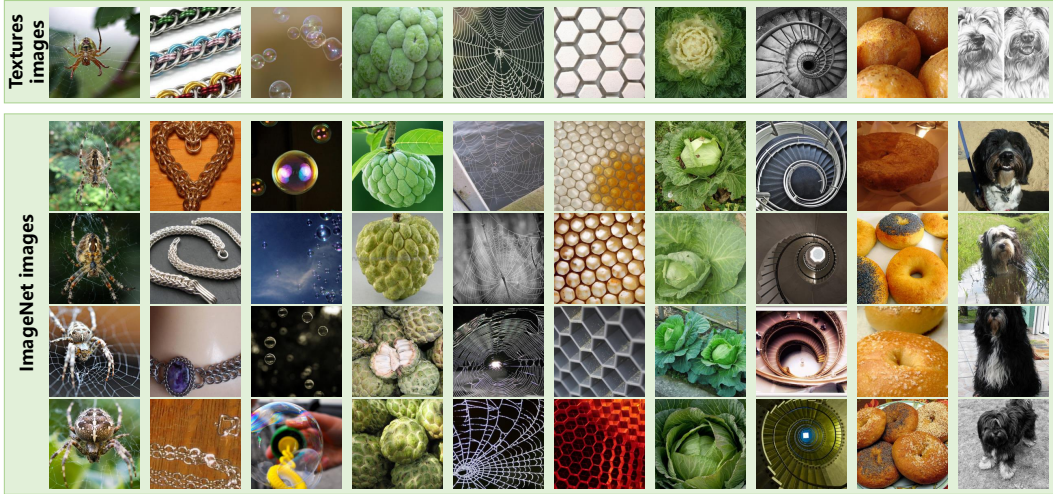

Figure 2: Examples of semantically overlapping objects between ImageNet and Textures datasets

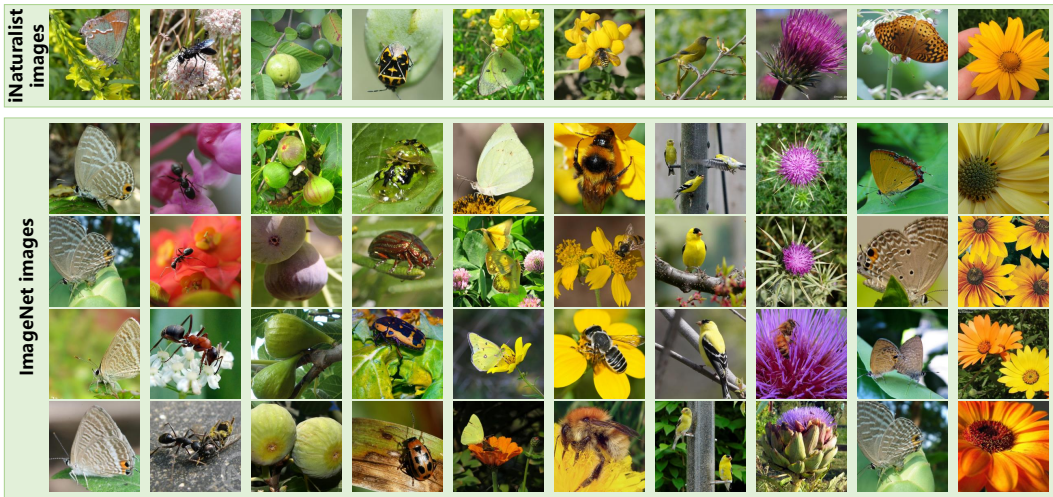

Figure 3: Examples of semantically overlapping objects between ImageNet and iNaturalist datasets

Furthermore, we automatically extracted potential SOO images with relatively higher density values  $p(x)$  from three test OOD dataset, followed by manual confirmation and identification of SOO samples, of which a subset of the SOO images ( $\sim 2000$  images) was finally selected. Fig.4 shows the distribution of log-likelihood values  $\log(p(x))$  of the SOO samples and the remaining testing samples from OOD datasets. It can be observed that the SOO images yield a relatively lower OOD score (higher density value), which also validates the effectiveness of the proposed method.

### A.10 Computation efficiency comparison to memory-intensive approaches

The inference time and memory requirements for comparing our method with two memory-intensive approaches, i.e., Gram [4] and pNML [5] are listed below in Table 17 (evaluating 5000 images in our ImageNet experiment, PyTorch framework with Nvidia A100 GPU). It worth mentioning that another evaluated method OECC [6] in our manuscript had similar memory requirement as the Gram method since they combined Gram features for OOD detection.

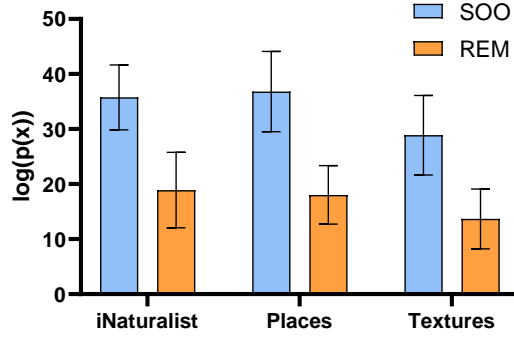

Figure 4: Log-likelihood value (inverse OOD score) distributions  $\log(p(x))$  of images with identified semantically overlapping objects (SOO) and remaining images (REM) in the three test OOD datasets.

Table 17: Computation cost comparison

|                     | Ours     | pNML     | Gram     |
|---------------------|----------|----------|----------|
| GPU Memory (MB)     | 4289     | 7949     | 25598    |
| Inference time (ms) | 53506.12 | 49374.42 | 74044.12 |

## References

- [1] Jun Shao. *Mathematical statistics*. Springer Science & Business Media, 2003.
- [2] Sébastien Marcel and Yann Rodriguez. Torchvision the machine-vision package of torch. In *Proceedings of the 18th ACM international conference on Multimedia*, pages 1485–1488, 2010.
- [3] Yiyou Sun, Chuan Guo, and Yixuan Li. React: Out-of-distribution detection with rectified activations. In *Advances in Neural Information Processing Systems*, pages 144–157, 2021.
- [4] Chandramouli Shama Sastry and Sageev Oore. Detecting out-of-distribution examples with gram matrices. In *Proceedings of the 37th International Conference on Machine Learning*, pages 8491–8501, 2020.
- [5] Koby Bibas, Meir Feder, and Tal Hassner. Single layer predictive normalized maximum likelihood for out-of-distribution detection. In *Advances in Neural Information Processing Systems*, pages 1179–1191, 2021.
- [6] Aristotelis-Angelos Papadopoulos, Mohammad Reza Rajati, Nazim Shaikh, and Jiamian Wang. Outlier exposure with confidence control for out-of-distribution detection. *Neurocomputing*, 441:138–150, 2021.
